# Supplementary material for: BAERLIN2014 – stationary measurements and source apportionment at an urban background station in Berlin, Germany
Source: Copernicus journal article supplement (doi:10.5194/acp-2017-1049), 2017-12-14
Supplement: Supplementary file [file acp-2017-1049-AC1-supplement.pdf]

# BAERLIN2014 – stationary measurements and source apportionment at an urban background station in Berlin, Germany

Erika von Schneidmesser<sup>1</sup>, Boris Bonn<sup>1\*</sup>, Tim M. Butler<sup>1</sup>, Christian Ehlers<sup>2a</sup>, Holger Gerwig<sup>3</sup>, Hannele Hakola<sup>4</sup>, Heidi Hellén<sup>4</sup>, Andreas Kerschbaumer<sup>5</sup>, Dieter Klemp<sup>2</sup>, Claudia Kofahl<sup>2b</sup>, Jürgen Kura<sup>3</sup>, Anja Lüdecke<sup>3</sup>, Rainer Nothard<sup>5</sup>, Axel Pietsch<sup>3</sup>, Jörn Quedenau<sup>1</sup>, Klaus Schäfer<sup>6</sup>, James J. Schauer<sup>7</sup>, Ashish Singh<sup>1</sup>, Ana-Maria Villalobos<sup>7</sup>, Matthias Wiegner<sup>8</sup>, Mark G. Lawrence<sup>1</sup>

<sup>1</sup>Institute for Advanced Sustainability Studies (IASS), D-14467 Potsdam, Germany

<sup>2</sup>IEK-8, Research Centre Jülich, D-52425 Jülich, Germany

<sup>3</sup>Division Environmental Health and Protection of Ecosystems, German Environment Agency, D-06844 Dessau-Roßlau, Germany

<sup>4</sup>Finnish Meteorological Institute, FI-00560 Helsinki, Finland

<sup>5</sup>Senate Department for the Environment, Transport and Climate Protection, D-10179 Berlin, Germany

<sup>6</sup>Institute of Meteorology and Climate Research, Atmospheric Environmental Research (IMK-IFU), Karlsruhe Institute of Technology (KIT), D-82467 Garmisch-Partenkirchen, Germany

<sup>7</sup>Environmental Chemistry and Technology Program, University of Wisconsin-Madison, Madison 53705, WI, USA

<sup>8</sup>Ludwig-Maximilians-Universität, Meteorological Institute, D-80333 Munich, Germany

\*now at: Chair of Ecosystem Physiology, Institute of Forest Sciences, Albert-Ludwig Universität, D-79110 Freiburg, Germany

<sup>a</sup>now at: Fachbereich 42: Kontinuierliches Luftqualitätsmessnetz, Landesamt für Natur, Umwelt und Verbraucherschutz NRW, D-45133 Essen, Germany

<sup>b</sup>now at: Institut für Physikalische Chemie, Georg-August-Universität, D-37077 Göttingen, Germany

Correspondence to Erika von Schneidmesser (evs@iass-potsdam.de)

**Abstract.** The Berlin Air quality and Ecosystem Research: Local and long-range Impact of anthropogenic and Natural hydrocarbons (BAERLIN2014) campaign was conducted during the three summer months (June–August) of 2014. During this measurement campaign, both stationary and mobile measurements were undertaken to address complementary aims. This paper provides an overview of the stationary measurements and results that were focused on characterization of gaseous and particulate pollution, including source attribution, in the Berlin-Potsdam area, and quantification of the role of natural sources in determining levels of ozone and related gaseous pollutants. Results show that biogenic contributions to ozone and particulate matter are substantial. One indicator for ozone formation, the OH reactivity, showed a 31% ( $0.82 \pm 0.44 \text{ s}^{-1}$ ) and 75% ( $3.7 \pm 0.90 \text{ s}^{-1}$ ) contribution from biogenic NMVOCs for urban background ( $2.6 \pm 0.68 \text{ s}^{-1}$ ) and urban park ( $4.9 \pm 1.0 \text{ s}^{-1}$ ) location, respectively, emphasizing the importance of such locations as sources of biogenic NMVOCs in urban areas. A comparison to NMVOC measurements made in Berlin ~~ca.~~ <sup>approx.</sup> 20 years earlier generally show lower levels today for anthropogenic NMVOCs. A substantial contribution of secondary organic and inorganic aerosol to PM<sub>10</sub> concentrations was quantified. In addition to secondary aerosols, source apportionment analysis of the organic carbon fraction identified the contribution of biogenic (plant-based) particulate matter, as well as primary contributions from vehicles, with a larger contribution from diesel compared to gasoline vehicles, as well as a relatively small contribution from wood burning, linked to measured levoglucosan.

## 1 Introduction

46 Air pollution and climate change are two of the most prescient environmental problems of our age. Recent  
47 research from the Global Burden of Disease study and others attribute over 3 million premature deaths to  
48 outdoor air pollution globally in 2013 (Brauer et al., 2016; Lelieveld et al., 2015; WHO, 2016). A report by the  
49 World Bank (WorldBank, 2016) estimated the 2013 welfare losses owing to ambient surface level PM<sub>2.5</sub> and O<sub>3</sub>  
50 air pollution to be equivalent to 5% of GDP in Europe, and often more in other world regions. Studies have  
51 shown that a changing climate will exacerbate ozone owing to increased temperatures and other factors, such as  
52 additional meteorological parameters and less effective emissions controls, that are favorable to ozone formation  
53 (Jacob and Winner, 2009; Rasmussen et al., 2013). One such factor is a projected increase in biogenic volatile  
54 organic compound emissions, such as isoprene or monoterpenes. While these increases are expected to be  
55 compensated for by much larger declines in anthropogenic emissions, as also indicated in other studies e.g.  
56 Colette et al. (2013) or West et al. (2013), there are additional impacts that are not yet captured by the models,  
57 such as those of secondary organic aerosol (SOA) among others, that show that such estimates of climate change  
58 effects are likely underestimated (Geels et al., 2015). While significant reductions in O<sub>3</sub> precursor emissions  
59 have been observed over the past couple decades, and peak ozone levels have been declining over much of  
60 north-western Europe, a comparable reduction in mean ozone has not followed (Derwent, 2008; Ehlers et al.,  
61 2016). This is particularly relevant for countries where the majority of the population resides in cities. In Europe  
62 during 2012-2014, more than 85% of the urban population has been exposed to air pollutant concentrations of  
63 ozone and PM<sub>2.5</sub> exceeding the recommended WHO limit values for the protection of human health, as well as  
64 substantial exceedances at the roadside of nitrogen dioxide (NO<sub>2</sub>) (EEA, 2016). In this context, it is crucial that  
65 we further improve our understanding of the sources of air pollutants in urban areas, as well as the contribution  
66 of natural sources to secondary pollutants such as ozone. This will allow for approaches that can better target the  
67 most relevant sources for mitigation, as well as accounting for the linkages between air quality and climate  
68 change in developing strategies for action on climate change and the reduction of air pollution, to improve health  
69 and create more livable cities.

70 The Berlin Air quality and Ecosystem Research: Local and long-range Impact of anthropogenic and  
71 Natural hydrocarbons 2014 (BAERLIN2014) campaign aimed to address some of these issues in the context of  
72 the Berlin-Potsdam urban area. The campaign had three main aims, (1) characterization of gaseous and  
73 particulate pollution, including source attribution, in the Berlin-Potsdam area, (2) quantification of the role of  
74 natural sources, specifically vegetation, in determining levels of gaseous pollutants, specifically ozone, and (3)  
75 improved understanding of the heterogeneity of pollutants throughout the city. In this paper, only aims (1) and  
76 (2) will be addressed. An overview paper describing the mobile measurements, which focused more on aim (3)  
77 was published previously (see Bonn et al. (2016)). Because of the focus on ozone and secondary pollutant  
78 formation, the campaign was conducted during the three summer months (June-August) of 2014, i.e. the time of  
79 maximum ozone pollution levels. Furthermore, while the mobile measurements covered the larger Berlin-  
80 Potsdam area, the stationary measurements were focused on an urban background location within the center of  
81 Berlin.

82 The unique characteristics of Berlin were particularly relevant to this study, in that it is a large urban  
83 area (population ~~ea-~~approx. 3.5 million) with significant vegetation. Of the ~~ea-~~approx. 890 km<sup>2</sup> that Berlin  
84 covers, ~~ea-~~approx. 34% of the land surface area is covered by vegetated areas and 6% by water  
85 (Senatsverwaltung für Stadtentwicklung III F, 2010). An existing air quality monitoring network (in German:  
86 Berliner Luftgüte Messnetz, abbreviated BLUME) provided data on which the campaign could build and

Field Code Changed

leverage. Data from the 16 stations that comprised the BLUME network showed that the EU 8-hour ozone target value of  $120 \mu\text{g m}^{-3}$  was exceeded 12-13 times at each of the two urban background stations that measure ozone (MC010 & MC042) and between 12-21 times per station at the stations on the periphery of the city (referred to here as Berlin rural stations) in 2014 (Stülpnagel et al., 2015). Six of these exceedances in the urban background occurred during the BAERLIN2014 campaign. Furthermore, the regulatory limit value for annual  $\text{NO}_2$  of  $40 \mu\text{g m}^{-3}$  was exceeded at all six roadside stations in 2014, and although the annual  $\text{PM}_{10}$  limit value was met, four out of five traffic stations where  $\text{PM}_{10}$  was measured also exceeded the daily limit value of  $50 \mu\text{g m}^{-3}$  more than the allowed 35 times; the exceedances at the urban background and Berlin rural stations ranged from 14 to 34 times (Stülpnagel et al., 2015). In short, the issue of air pollution has been recognized in Berlin as being in need of action. In this paper, we focus on the stationary measurements conducted at the urban background site in the Berlin city center. A brief overview is given of the suite of measurements conducted and the results obtained. This is followed by more detailed analysis of (1) the NMVOC data and the role in ozone formation including a comparison to a previous study in London and Paris (von Schneidemesser et al., 2011), as well as other urban areas, and (2) source apportionment analysis of  $\text{PM}_{10}$  filter samples, including a rough comparison of the results to existing emission inventories.

## 2 Methods

A complete list of the parameters measured and their associated instrument descriptions are summarized in Table 1.

### 2.1 Site description

The monitoring station that was the basis for the stationary measurements during the BAERLIN2014 campaign was AirBase station DEBE034, which is maintained as part of the Berlin air quality measurement network (BLUME; BLUME network code MC042), and was located at the corner of Nansenstrasse and Framstrasse in the Neukölln district, in southeast central Berlin ( $52^\circ 29' 21,98'' \text{ N}$ ,  $13^\circ 25' 51,08'' \text{ E}$ ) in a predominantly residential neighborhood, as shown in Figure 1. The station was located on the street corner next to a kindergarten and was classified as an urban background station. According to the location placement dictated by the EU Directive definition (EC, 2008), locations that are situated away from any strong point sources including major roads, typically in a residential neighborhood, but still in the urban core influenced by all sources upwind of the station are classified as urban background. These sites should in theory be representative of the general levels of pollution observed in a city and are used to assess exposure of the general population to air pollutants. This station will likely experience a comparatively high fraction of traffic-related emissions, since some fairly large inner-city thoroughfares were located within a 1 km radius of the site, but as appropriate for an urban background station will not be dominated by traffic like a site located at a major intersection. In addition, a measurement van was used to augment the capacity of the measurement station and was located approximately 5 meters from the station, parked at the curb of the street (see Figure 1). Finally, owing to the presence of taller trees in that part of city, including in the vicinity of the monitoring station, one instrument (ceilometer) was located on the roof of the kindergarten to achieve an unobstructed view skywards, approximately 5 meters on the opposite side of the measurement station to the van.

Field Code Changed

Field Code Changed

Field Code Changed

Field Code Changed

A number of NMVOC canister samples were taken in locations throughout the city as part of the mobile measurements that augmented the stationary measurements in Neukölln. A subset of these were included in the companion paper to this one covering the mobile measurements (Bonn et al., 2016). These sites where multiple NMVOC canister samples were taken include Altlandsberg, Plänterwald, the Tiergarten Tunnel, and the so-called 'AVUS Motorway' during a traffic jam. Further details to the sampling environment can be found in Table 2. For more information on locations and/or sampling, see also Bonn et al. (2016).

Field Code Changed

## 2.2 Instrument descriptions

Complementing the BLUME measurements (see (Stülpnagel et al., 2015) or (Geiß et al., 2017) for details) were additional PM<sub>10</sub> filter samples collected for elemental carbon (EC) and organic carbon (OC), ions, and organic tracer analysis; intermittent canister and cartridge samples for the quantification of non-methane volatile organic compounds (NMVOCs) from an inlet next to the PM<sub>10</sub> inlet on the roof of the measurement station; a quadrupole Proton Transfer Reaction Mass Spectrometre (high sensitivity PTR-MS, Ionicon) up in the van for the measurement of NMVOCs; a set of particle instruments to measure number concentration, size distribution and surface area also located in the van (section 2.2.4); and a ceilometer CL51 (Vaisala GmbH, Hamburg) situated on the roof of the kindergarten. A complete list of instruments, parameters measured, and references for the methods used are provided in Table 1. Further details for the NMVOC measurements are provided in Table S1. Additional information is provided below.

Field Code Changed

Field Code Changed

### 2.2.1 NMVOC Canister Samples

The canisters were prepared to remove ozone using a heated silco-steel capillary (120 °C) prior to sampling. The cylinders were then pressurized using synthetic air to reduce the relative humidity of the sample. All NMVOC canister samples taken at Neukölln had a 20 minute sampling duration. After sampling, the canisters were promptly shipped to FZJ for analysis by GC-FID-MS and were analyzed with no more than five days between sampling and analysis. Analysis was done using a gas chromatographic system based on a conventional gas chromatograph (Agilent 6890) equipped with a flame ionization detector (FID), and a mass spectrometer (Agilent 5975C MSD) for the identification of the trace species. To analyze VOCs at trace gas levels, a cryogenic pre-concentration was used, consisting of a sample loop (silco steel, 20 cm length, inner diameter 2 mm) which was cooled down with cold gas above liquid nitrogen (see also Figure 14 in Ehlers et al., (2016)). A volume of 800 mL was pre-concentrated in the sample loop at a flow of 80 mL min<sup>-1</sup>.

Field Code Changed

Subsequently, the sample was thermally desorbed at 120° C and injected on a capillary column (DB-1, 120 m, 0.32 mm ID, 3µm film thickness). After injection, the column was kept isothermal at -60°C for 5 min, then heated to 200° C at a rate of 4° min<sup>-1</sup> and finally maintained at 220° C for 10 min. Signals were gathered from a flame ionization detector and a MSD, which each received 50% of the column output through a split valve. Analysis of one sample lasted for about 90 min, and sets of 10 cylinders (stainless steel canister, volume: 6 L, Supelco Co., Bellefonte, PA, USA) could be analyzed by unattended operation.

The impact of canister transport and storage was assessed: C<sub>2</sub> - C<sub>11</sub> alkanes, alkenes and aromatic compounds were found to be stable within 5% over three days compared with an instantaneously analysed sample. Oxygenated compounds differed by up to 10% and terpenes by up to 20% over the same time period (Hengst, 2007). In addition, measurement accuracy depends on the uncertainty of the calibration standard (< 5% between true and declared gas concentrations, (Apel-Riemer Environmental Inc.) and that of the mass-flow

Field Code Changed

controller (< 2% deviation, MKS Instruments, Wilmington, MA, USA). Integration uncertainties ( $\Delta\mu\text{VOC}$ ) of the peak areas were dependent on their respective detection limits ( $DL_i$ ), which are estimated as in equation 1.

$$\Delta\mu\text{VOC}_i \approx \begin{cases} DL_i & \text{for } \mu\text{VOC}_i \text{ next to } DL_i \\ (0,03-0,06)*\mu\text{VOC}_i & \text{otherwise} \end{cases} \quad (1)$$

Apart from concentrations and their respective detection limits geometrical addition of all these factors yielded overall experimental uncertainties of less than 10% (for a detailed discussion refer to Urban (2010)).

### 2.2.1.1 Canister Samples and OH Reactivity Calculations

While a total of 103 compounds were quantified by GC-MS in the canister samples, not all of those compounds were regularly detected in the samples. Furthermore, to be able to make reasonable comparisons with previous work regarding the contribution of different compound classes to the measured mixing ratios of NMVOCs, as well as the OH reactivity attributed to these NMVOCs, a subset of the compounds was selected and used in the analysis. This subset was based on a number of papers in the literature that were also done in urban areas, and those compounds that were regularly included in OH reactivity calculations (e.g. (Dolgorouky et al., 2012; Gilman et al., 2009; Goldan et al., 2004; Liu et al., 2008)). This includes 57 NMVOCs (see SI). Furthermore, even if all compounds were included, there would still be missing reactivity that is not captured and because no OH measurements were made, the amount of missing reactivity cannot be reliably quantified. Owing to an undetermined source of contamination at the urban background site, the measurement of n-butane was compromised, and was therefore not included among the NMVOCs despite typically being reported in the literature. The data subsequently presented in this paper from the canister samples includes only these 57 compounds unless otherwise noted. For a complete list of the 103 compounds measured in the samples, including the concentrations reported for a subset of the samples discussed here, please see Bonn et al. (2016).

A number of canister samples were taken at different locations throughout the city, some with multiple measurements and some single samples. Five locations had multiple samples, including the main measurement site at the urban background station (DEBE034) in Neukölln (n=18), Plänterwald (n=11), Altlandsberg (n=10), the Tiergarten Tunnel (n=9), and the AVUS motorway during a traffic jam (n=2). All samples were taken during the month of August, will all samples except those in Neukölln taken on one day for any given location (Bonn et al., 2016). The samples in the Tiergarten tunnel and on the motorway are most indicative of NMVOC emissions from traffic.

### 2.2.2 NMVOC Cartridge Samples

NMVOCs (aromatic hydrocabons, terpenes,  $C_6$ - $C_{10}$  alkanes) were collected into stainless steel cartridges (6.3 mm ED x 90 mm, 5.5 mm ID) filled with Tenax-TA (60/80 mesh, Supelco, Bellafonte, USA) and Carboback-B (60/80 mesh, Supelco, Bellafonte, USA) by using a flow rate of 100 ml min<sup>-1</sup> with a sampling time of 1 - 4.5 h (Mäki et al., 2017). To prevent the degradation of BVOC by O<sub>3</sub>, a catalyst heated to 150°C was used.

Individual VOCs were identified and quantified using a thermal desorption instrument (Perkin-Elmer TurboMatrixTM 650, Waltham, USA) connected to a gas chromatograph (Perkin-Elmer® Clarus® 600, Waltham, USA) with a DB-5MS (60 m, 0.25 mm, 1 µm) column and a mass selective detector (Perkin-Elmer® Clarus® 600T, Waltham, USA). Five-point calibration was utilised using liquid standards in methanol solutions. Standard solutions were injected onto adsorbent tubes that were flushed with nitrogen (HiQ N<sub>2</sub> 6.0 >99.9999%,

Field Code Changed

Linde AG, Pullach, Germany) flow ( $100 \text{ ml min}^{-1}$ ) for 10 min in order to remove methanol. For aromatic hydrocarbons (benzene, toluene, ethylbenzene, p/m-xylene, styrene, o-xylene, propylbenzene, ethyltoluenes, trimethylbenzenes) detection limits (LODs) varied between 5 and  $60 \text{ ng m}^{-3}$ , for  $\text{C}_{6-10}$  alkanes (hexane, heptane, octane, nonane, decane) between 5 and  $10 \text{ ng m}^{-3}$  and for isoprene LOD was  $21 \text{ ng m}^{-3}$ . The quantified monoterpenes (MT) were  $\alpha$ -pinene, camphene,  $\beta$ -pinene,  $\Delta^3$ -carene, p-cymene, limonene, 1,8-cineol, nopinone, terpinolene and bornylacetate with limit of detection in the range of  $3\text{--}17 \text{ ng m}^{-3}$ ; sesquiterpenes were longicyclene, iso-longifolene, aromadendrene,  $\beta$ -caryophyllene and  $\alpha$ -humulene with LOD of  $20 \text{ ng m}^{-3}$ .

### 2.2.3 NMVOC PTR-MS Measurements

In addition to canister and cartridge samples, NMVOCs were continuously measured over time by a high-sensitivity proton transfer reaction mass spectrometer (PTR-MS, Ionicon, built in 2008) (Lindinger et al., 1993). In brief NMVOCs with a higher proton affinity than water vapor were charged via  $\text{H}_3\text{O}^+$  ions and subsequently mass selectively detected by applying a distinct electric field strength for the individual masses selected. More details on the techniques can be found elsewhere (Blake et al., 2009). In total, 72 selected NMVOCs were measured between June 11 and August 29, 2014 via a heated inlet ( $T = 60^\circ\text{C}$ ) at street level out of the street facing window of a measurement van (MW088) at approximately 2.5 m above surface. Note that this PTR-MS detected integer ion mass numbers only and no time of flight option was available for this version. Selection of masses were based on two aspects: first, typical mass to charge ( $m/z$ ) ratios for anthropogenic and biogenic sources like benzene, toluene, isoprene and terpenes, and second, on mass scan results conducted once a week throughout the campaign period. In this way some masses changed during the total observation time because of changed scan intensities and the limited number of masses to be selected. Time resolution was set to 270 s, i.e. 4.5 min. The dataset was averaged after the campaign for 30 min and 1h for comparison with other less time resolved measurement data. Instrument parameters were set as follows:  $U_{\text{QL}} = 50 \text{ V}$ ,  $U_{\text{N}} = 60 \text{ V}$ ,  $U_{\text{SO}} = 70.3 \text{ V}$  and  $U_{\text{S}} = 113.9 \text{ V}$ . The intensity of the reference ion signal for detection efficiency, i.e.  $m/z = 21$ , was recorded as  $(4.4 \pm 1.0) \times 10^7$  counts per second. For more details on the set-up see Bourtsoukidis et al. (2014). A list of all recorded masses can be found in the supporting online information. Because the PTR-MS technique does not allow for a detailed chemical structure analysis, the cartridge and canister samples were used as complementary information as to the identity of masses with more than a single compound present.

### 2.2.4 Particle Number Concentration and Surface Area Measurements

The aerosol inlet was located 3.5 m above ground, about 1 m above the measurement van roof, attached to an aerosol splitter (Leibniz Institute for Tropospheric Research (TROPOS), "Kuh"). A LVS pump (Leckel GmbH, Berlin) operated at  $1 \text{ m}^3 \text{ h}^{-1}$  corresponding to an aerosol flow of  $138 \text{ cm}^3 \text{ sec}^{-1}$  and a PM10-head (Leckel GmbH, Berlin) suitable for cut of at  $10 \mu\text{m}$  with  $2.3 \text{ m}^3 \text{ h}^{-1}$  was used to reduce diffusion losses. This served all particle measurement instruments.

The instruments that measured particle number (PN) and particle size distribution included a GRIMM 1.108 (particle sizes in optical equivalent diameter, GRIMM Aerosol Technik GmbH & Co. KG, Ainring), GRIMM 5.403, and GRIMM 5.416 (particle sizes in mobility equivalent diameter). Sampling average was mostly 1 min and 8 minutes for Grimm 5.403.

The GRIMM 5.416, a condensation particle counter with n-butanol, provided total PN count over a size range from 4-3000 nm at a flow rate of  $1.5 \text{ L min}^{-1}$ , and the uncertainty for 1 min sampling was  $\pm 0.1\%$  or  $\pm 15$

Field Code Changed

Field Code Changed

Field Code Changed

cm<sup>-3</sup> (Helsper et al., 2008; Wiedensohler et al., 2017). The GRIMM 5.403, a scanning mobility particle sizer equipped with a long DMA combined with a CPC with n-butanol measured particle number concentrations with size distribution information for particles between 10-1100 nm at a sample flow rate of 0.3 L min<sup>-1</sup> and a sheath flow rate of 3 L min<sup>-1</sup>. For technical details see Heim et al., (2004). The uncertainty associated with the measurement is size dependent, with an uncertainty range of 10-15% in the lowermost size range and ~~ea-~~approx. 2-3% in the upper size range, and a total of 44 size bins. The GRIMM 1.108, a portable laser aerosol spectrometer and dust monitor measured particle number concentration with size distribution information, covering 350-22500 nm, with a sampling flow rate of 1.5 L min<sup>-1</sup>. Particle number concentrations were determined for 15 size bins with an uncertainty of ± 3%. For technical details see Görner et al. (2012).

Field Code Changed

Field Code Changed

Field Code Changed

Field Code Changed

The TSI Nanoparticle surface area monitor 3550 (NSAM) measured lung depositable surface area for particle sizes ranging from 10-1000 nm at a flow rate of 2.5 L min<sup>-1</sup>. These values are reported in units of µm<sup>2</sup> cm<sup>-3</sup> corresponding to empirically derived parameters that correspond to the regions where the particles are deposited in the lung. Alveolar deposition was measured. Measurement accuracy for the NSAM was ± 20% for both parameters. Further instrument and measurement details are described elsewhere (Kaminski et al., 2013; VDI, 2017).

Field Code Changed

Field Code Changed

The NSAM was calibrated at the German Environment Agency (UBA, Langen) with instruments from IUTA, Duisburg (Kaminski, 2011), the GRIMM 1.108 was sent in for maintenance and re-calibrated at the manufacturer prior to use in the campaign, while all other instruments were calibrated a priori at the TROPOS aerosol calibration facility in Leipzig (Weinhold, 2014).

Field Code Changed

Field Code Changed

A continuous aerosol size distribution (0.01 µm to 30 µm) was created using a combination of GRIMM 5.403 (0.01 µm to 1.1 µm) and GRIMM 1.108 (0.3 µm to 30 µm). Averaged 1-h size distribution from both particle instruments were merged to create a full size distribution from 0.01 to 30 µm. Size distributions from the two analyzers were merged by considering GRIMM 5.403 for particles sizes <1.1 µm and sizes equal or above 1.1 µm uses GRIMM 1.108. At 1.1 µm both individual logarithmic size bin boundaries of the 5.403, and 1.108 were most similar allowing “a smooth merge” without losing any size bins. We also assumed that the particles were spherical and thus no adjustments were made in the size bins, nor were any adjustments made for possible differences in aerodynamic vs optical derivation of diameter.

## 2.2.5 Ceilometer

State-of-the-art ceilometers provide the vertical profile of aerosol backscatter (Wiegner et al., 2014). There are numerous approaches to estimate the mixing layer height (MLH) from the measured profile; the underlying assumption is that at the top of the mixing layer aerosol concentration drastically drops resulting in a pronounced decrease of backscattered signal intensity. Measurements in the framework of BAERLIN2014 were performed with a Vaisala ceilometer CL51 (Münkel, 2007; Geiß et al., 2017). This instrument is eye-safe (class 1M), operated fully automated and unattended. The diode laser emits at a wavelength of 910 nm; the absorption by water vapour can be ignored as long as only the MLH is to be determined (Wiegner and Gasteiger, 2015). Laser power and window contamination are permanently monitored to ensure long-term stability. Due to the one lens design the lowest detectable layers are around 50 m, and the system is capable to cover an altitude range greater than 4000 m, topping out around 8 km. Signals are pre-processed, e.g. for the suppression of noise generated artefacts. The range resolution is 10 m, and the temporal averaging is 10 min.

Field Code Changed

Field Code Changed

Field Code Changed

Field Code Changed

288 The heights of the near surface aerosol layers were analysed by a gradient method from the backscatter  
289 profiles in real-time (Emeis et al., 2008) with a MATLAB-based software which is provided by the manufacturer  
290 and has been improved continuously (Münkel et al., 2011). The minima of the vertical gradient is used to  
291 provide an estimate of the MLH (Emeis et al., 2007). All MLH data presented are following this method (for  
292 more detail see Schäfer et al. (2015)) unless otherwise noted. The influence of different options of the  
293 proprietary software and an comparison with the more sophisticated approach COBOLT (COntinuous BOundary  
294 Layer Tracing) on the retrieved MLH is discussed in detail by Geiß et al. (2017). It was found that the  
295 proprietary software slightly tends to overestimate the MLH compared to COBOLT.

Field Code Changed

296 The various instruments outlined above had differing sampling times and so for those instruments that  
297 provided real-time or higher time resolution data, a 30 minute average will be used in the data presented here for  
298 comparability.

#### 300 2.2.6 PM<sub>10</sub> Filter Analysis

301 Prior to sampling, the quartz fiber filters were baked at 800°C under synthetic air to remove impurities.  
302 Post-sampling, the PM<sub>10</sub> filters were analyzed for total mass, elemental carbon (EC), water soluble and total  
303 organic carbon, chloride, sulfate, nitrate, sodium, ammonium, potassium, calcium, and organic tracers.  
304 HYSPLIT back trajectories (based on GDAS meteorological data) were calculated for 72 hours over the time  
305 period of each filter with a new trajectory each 6 hours for air masses ending at ground level (at the monitoring  
306 station) (Stein et al., 2015). Back trajectory plots are included in the Supplemental Information following the  
307 final filter groups. Based on similarities in the bulk composition analysis and HYSPLIT back trajectory  
308 information, the filters were grouped before being extracted and analyzed for organic tracers. Not all filters were  
309 included in these groups, so as to create groups that showed significant similarities. Some individual filters were  
310 therefore also excluded from the organic tracer analysis because of a lack of remaining OC mass.

Field Code Changed

311 PM<sub>10</sub> mass was first quantified gravimetrically and then analyzed for elemental and organic carbon.  
312 For this the filter samples were heated to 750°C in an oxygen stream. The gas stream was then passed through an  
313 oxidation catalyst to ensure complete oxidation of the organic carbon to carbon dioxide (CO<sub>2</sub>). In contrast to the  
314 organic carbon, elemental carbon is directly oxidized at higher temperatures without the requirement of a  
315 catalyst. The organic carbon, as CO<sub>2</sub>, was then detected using a cavity ring-down spectrometer (Picarro Inc.).  
316 The distinction between the elemental and organic carbon fractions in the samples was based on the temperature  
317 profile during the analysis. For more details see Ehlers (2013) and Kofahl (2012).

Field Code Changed

Field Code Changed

318 A portion of the filter (1.5 cm<sup>2</sup>) was water extracted to determine water soluble organic carbon (WSOC)  
319 using a TOC-V SCH Shimadzu total organic carbon analyzer (Miyazaki et al., 2011; Yang et al., 2003). The  
320 remaining amount of OC was calculated as water insoluble organic carbon (WIOC). A fraction of the remaining  
321 solution was used to analyze for water soluble anions and cations by ion chromatography (Dionex ICS 2100 and  
322 Dionex ICS 100) (Wang et al., 2005). For the organic tracer analysis, filters were composited as per the bulk  
323 composition and HYSPLIT determined groups and extracted with 50/50 dichloromethane and acetone by  
324 sonication, an aliquot was derivatized and analyzed by GC-MS (GC-6980, quadropole MS-5973, Agilent  
325 Technology) for organic molecular marker compounds, as described in more detail by Villalobos et al. (2015)  
326 and references therein. Approximately 150 organic tracer species were analyzed for, of which less than 100 had  
327 concentrations regularly above the detection limit. A limited subset of these was then used in the source  
328 apportionment analysis.

Field Code Changed

Field Code Changed



329

## 330 2.3 Chemical Mass Balance for Source Apportionment

331 A chemical mass balance analysis of the organic carbon fraction of the PM<sub>10</sub> filter samples was carried  
332 out using the organic tracer information. Source apportionment analysis using the CMB technique provides an  
333 effective variance least squares solution for a set of linear equations that include the uncertainties of the input  
334 measurements, and have been applied to the mass balance receptor model (Watson et al., 1984). As such, it  
335 allows for the estimation of the contribution of different source categories to the ambient concentrations  
336 measured at any one location, in this case an urban background site in Berlin. The species included in the CMB  
337 analysis were levoglucosan, 17 $\alpha$ (H)-21 $\beta$ (H)-30-norhopane, 17 $\alpha$ (H)-21 $\beta$ (H)-hopane, benzo(b)fluoranthene,  
338 benzo(k)fluoranthene, benzo(e)pyrene, benzo(a)pyrene, and C27-C33 alkanes. The US EPA CMB Software  
339 version 8.2 was used. Source profiles for vegetative detritus (Rogge et al., 1993), wood burning (Fine et al.,  
340 2004), diesel and gasoline motor vehicles (Lough et al., 2007) were included in the final result. In addition, a  
341 profile for poorly maintained vehicles ('smoking vehicles') (Lough et al., 2007) was evaluated but found  
342 inappropriate. The link between tracers and sources is discussed in further detail in section 3.5.2. The secondary  
343 organic aerosol fraction was calculated based on WSOC not related to biomass burning (Sannigrahi et al., 2006).  
344 The fitting statistics for the final result are shown in Table 3.

Field Code Changed

345

## 346 3 Results & Discussion

347

### 348 3.1 Time Series and Diurnal Cycle

349 The 30 min data time series of O<sub>3</sub>, NO<sub>2</sub>, NO, CO, benzene, toluene, and PM<sub>10</sub>, along with basic  
350 meteorological data from the BLUME station in Neukölln and MLH as derived from the proprietary software are  
351 shown in Figure 2, spanning the duration of the campaign. All times are given in CET. The 8 h mean ozone  
352 concentrations show that the EU target value for ozone (120  $\mu\text{g m}^{-3}$  based on 8 h means) was exceeded 6 times  
353 during the measurement period, and the WHO guideline (100  $\mu\text{g m}^{-3}$ ) was exceeded 18 times. The hourly limit  
354 value for NO<sub>2</sub> (200  $\mu\text{g m}^{-3}$ ) was not exceeded, though concentrations often exceeded 100  $\mu\text{g m}^{-3}$ . The daily limit  
355 value for PM<sub>10</sub> (50  $\mu\text{g m}^{-3}$ ) was not exceeded.

356 Elevated concentrations were often observed at the same time for many of the pollutants included in  
357 Figure 2, with the exception of ozone. Ozone, as a secondary pollutant formed photochemically from NO<sub>x</sub> and  
358 NMVOC precursors, follows a similar pattern to temperature (Pearson correlation coefficient [standard error] of  
359 0.82 [0.014]), and peaks at different times than the primary pollutants. The formation of ozone can be limited by  
360 either NO<sub>x</sub> or NMVOCs, depending on the ambient concentrations which are controlled by sources (e.g.,  
361 vehicles, biogenics) and transport. NO<sub>2</sub>, NO, CO, toluene, and benzene all have diurnal cycles that peak in the  
362 morning and evening, reflecting their anthropogenic traffic-related emission sources (see Figure S1 in SI). The  
363 morning peak in the pollutants occurred at 7 or 8 am, while the evening peak occurred quite late between 9 and  
364 11 pm, likely owing to a combination of daytime emissions and the decrease in the MLH. Traffic counts, from  
365 MC143 and MC220 in Neukölln (see location in Figure 1), showed that traffic increased dramatically between 6  
366 and 8-9 am, after which a slow but steady increase led to a peak at 5-6 pm, after which the traffic count dropped  
367 dramatically. In contrast, ozone, temperature, and mixing layer height followed parallel diurnal cycles with a  
368 minimum at 6 am and a broad afternoon peak between noon and 6 pm. During BAERLIN2014 the maximum  
369 height of the mixing layer was found to be 1.5-2 km between noon and 18:00 and below 500 m during the

Formatted: Subscript

370 night/early morning. These numbers indicate the vertical extent of the urban pollution layer over the  
371 measurement site where pollutants are most likely residing. Relative humidity showed the opposite with a peak  
372 at 6 am, and a broad low between noon and 6 pm.

373 These results are supported by the Pearson correlation coefficients among NO<sub>2</sub>, NO, CO, toluene, and  
374 benzene, which for hourly values range from 0.51-0.82 (all statistically significant at an alpha=0.05; see Table  
375 S2), with the strongest relationship between CO and NO<sub>2</sub>. The correlation to relative humidity was found to be  
376 negative for MLH (-0.66 [0.022]), temperature (-0.71 [0.014]), and ozone (-0.76 [0.014]). The pollutant with the  
377 strongest relationship to temperature was ozone.

378 The time series of particulate matter mass (PM<sub>10</sub>), derived PM<sub>1</sub>, PM<sub>2.5</sub>, and PM<sub>10</sub> mass from the  
379 GRIMM 1.108 particle number size distribution measurements, total particle number, and particle surface area  
380 are shown in Figure 3. While the two PM<sub>10</sub> time series along with the PM and particle number time series  
381 associated to the same instrument (GRIMM 1.108) are most similar, the other total particle number time series  
382 do not show significant similarities. This is largely owing to the difference in size fractions measured by the  
383 different instruments. Correlation analysis of the pollutant concentrations from Neukölln with MLH values on  
384 the basis of averaged diurnal cycles of hourly-mean values (in our case monthly averages during July and  
385 August) provided highest correlations with PN for accumulation mode particles (size range 100 – 500 nm) and  
386 significant correlations for PM<sub>2.5</sub> and PM<sub>1</sub> (Schäfer et al., 2015) showing similarities to investigations in  
387 Augsburg, Germany (Schäfer et al., 2016) and Beijing, China (Tang et al., 2016). In addition to this  
388 investigation for the reference site, a more detailed correlation analysis of the MLH with PM<sub>10</sub>, O<sub>3</sub>, and NO<sub>x</sub>  
389 taking into account all 16 BLUME stations in Berlin was carried out using the MATLAB approach outlined  
390 here, as well as an alternative approach, COBOLT (Geiß et al., 2017). In this context it was assumed that the  
391 MLH derived for the reference site in Neukölln is representative for the entire metropolitan area of Berlin. The  
392 correlation analysis of the diurnal cycles (averaged over the duration of ceilometer measurements from  
393 BAERLIN2014) of the MLH and PM<sub>10</sub> found that correlations were completely different at the different sites  
394 regardless of site type, indicating that surface concentrations of PM<sub>10</sub> were not predominantly determined by the  
395 MLH, but rather by local sources and sinks, and meteorological factors, among others. In the case of O<sub>3</sub>, strong  
396 positive correlations were identified for both the BLUME sites on the periphery of Berlin, as well as the urban  
397 background locations. In contrast, for NO<sub>2</sub>, a negative correlation to MLH was observed for all sites at the  
398 periphery of the city, and to a lesser extent at some of the urban background sites (Geiß et al., 2017).

399 Particle size distribution during the study period is shown in Figure 4. Size distribution was dominated  
400 by ultrafine number size distribution (“UFP”, <100 nm) throughout the day (i.e. particle formation close by). The  
401 number and volume distribution was further binned into at least 5 size bins, as presented in Figure 4 for  
402 comparison with other urban background measurements. The average daytime total number and volume  
403 concentration remained in the range of 5.5 - 6.0 x 10<sup>3</sup> cm<sup>-3</sup> and 11 - 12 µm<sup>3</sup> cm<sup>-3</sup>, respectively, in contrast to the  
404 stronger signal during the nighttime. The mean (median) total number and volume concentration over the entire  
405 measurement period was 6.1 x 10<sup>3</sup> cm<sup>-3</sup> (5.4 x 10<sup>3</sup> cm<sup>-3</sup>) and 11.8 µm<sup>3</sup> cm<sup>-3</sup> (9.5 µm<sup>3</sup> cm<sup>-3</sup>), respectively. Over  
406 80% of the total number concentration is ultrafine particles, and the contribution is higher during the nighttime.  
407 Volume distribution is largely dominated by the accumulation mode particles which is typical of many urban  
408 sites. The number concentrations were similar to other urban stations in Germany (Birmili et al., 2016).

409 The diurnal cycles for total PN for the three instruments covering the smaller particles (excluding the  
410 observations from the GRIMM-1.108) have morning and evening peaks, similar to the diurnal cycle for NO<sub>2</sub>,

Field Code Changed

indicating a traffic origin. The diurnal cycle for the larger particles, as sampled by the GRIMM-1.108 has a much more dominant early morning peak and mid-afternoon minimum, without the second evening peak.

In Figure 5, at least two major contributors to UFP over the course of the day could be identified, in the morning and during the night. The presence of the morning peak is likely due to traffic-related emissions. Such a peak has also been identified in other species, as well as other studies in urban areas (Borsós et al., 2012; Mølgaard et al., 2013). There was a gradual increase in the UFP concentration from late afternoon which continues overnight till early morning hours. This nighttime feature of UFP was observed during weekends as well as on the weekdays. The reasons for this could be that the source contributing to this is something other than or in addition to traffic and may be active or enhanced overnight, the decrease in mixing layer height at night traps the particles in a smaller volume compared to daytime, and/or that night time deposition of particles is lower than daytime owing to higher atmospheric stability. The co-located trace gas measurement showed that the elevated UFP nighttime concentration correlates with toluene, among other gases such as CO. Daily observations also showed occasional and episodic “particle burst” (new particle formation) events for particles in the size range of 10-50 nm, which could be related to fresh plumes or to regional particle formation events.

### 3.2 NMVOC measurements – Method comparison

The results of the four NMVOC measurement methods were compared and contrasted for benzene and toluene. While differences in e.g., instrumentation and measurement technique (mass-to-charge ( $m/z$ ) ratios vs compounds), inlet location, and time resolution, do not allow for direct comparisons, a comparison can be useful to understand how different or similar the information provided by the various methods can be. A summary of these methods and the compounds measured, including information on the detection limits and sampling times is provided in Table S1.

The 30-min data reported from the BLUME [city air quality monitoring](#) network was compared to the PTR-MS data for  $m/z$  79 (benzene) and  $m/z$  93 (toluene), as both instruments provide high time-resolution data. The correlations between the two methods were good given the imperfect nature of the comparison, both with Pearson’s  $r$  values for benzene and toluene of 0.39, significant at the  $p < 0.05$  level. The lower correlation values were likely owing to a number of factors including the differences in measurement method, and in location of the inlets for each instrument and thereby source influences – one of which ([PTR-MS](#)) was located on the street side of the van at [ea-approx.](#) 2.5 m above ground, while the other ([BLUME](#)) was located above the measurement container [ea-approx.](#) 5 m from the street. The inlet at the street would be influenced more directly by vehicle emissions in comparison to the inlet above the measurement container, which is especially relevant in that the PTR-MS was likely influenced by individual vehicles, while this would not be the case for the container measurements. This influence of vehicles on the PTRMS data at higher time resolution is supported by an increase in Pearson’s  $r$  values with longer averaging times, which reduces the influence of individual vehicles. For 1 h (3 h) average concentrations the  $r$  values increase to 0.48 (0.58) and 0.53 (0.71) for benzene and toluene, respectively, all significant at the  $p < 0.05$  level. Furthermore, the Pearson’s  $r$  values for the correlations between the BLUME network and the individual canisters were 0.39 (benzene) and 0.83 (toluene), both statistically significant with  $p$ -values  $< 0.05$ , and between BLUME and the cartridge samples 0.51 (toluene) and not significant for benzene. All benzene and toluene measurements are shown in Figure S2.

In order to investigate the possibility of identifying molecular structures of PTR-MS derived  $m/z$  measurements, a comparison of the continuous measurements of the PTR-MS and intermittent canister samples

Field Code Changed

Field Code Changed

was also carried out. For a number of cases only one compound quantified from the canister samples matched a specific  $m/z$ , while in other cases multiple compounds were quantified in the canister samples that had the same mass. For example, propanal, acetone, n-butane, and 2-methylpropane all have a molecular weight corresponding to  $m/z$  59 (molar weight  $M_w = 58$  g/mole +  $M_w(H^+) = 1$  g/mole), among which the PTR-MS cannot distinguish. In some cases, the fractional contribution of compounds with the same  $m/z$  ratio was relatively similar across all canister samples, as for o-xylene, m+p-xylene, and ethylbenzene ( $m/z$  107). However this was rather the exception, with relative contributions more typically showing significant variation among the canister samples (see Figure S3 in the SI). Correlations between the canister samples and PTR-MS results were carried out for 35 individual  $m/z$  values for which at least one compound was quantified in the canister samples. While the absolute  $r$  values of the correlations ranged from 0.00016 to 0.63, the correlations were generally quite poor, showing little to no correlation for many of the  $m/z$  (only 9 of the 35 total number of  $m/z$  values evaluated had  $r$  values greater than 0.3), with no systematic bias identified. There are a number of reasons for this, beyond the difference in how the instruments measure ( $m/z$  vs compounds), such as ~~While the difference in e.g., inlet location, and sampling time, likely played a role, these results seem to indicate that the differences in instrument and quantification method result in substantial differences in what is being quantified so that the comparison does not hold real value.~~ Previously, in a targeted inter-comparison experiment where whole air samples (canisters) were compared with online PTR-MS measurements, differences of as little as 20 s in the sampling intervals contributed to scatter in the comparison of the two measurements that was especially relevant for the more reactive NMVOCs (de Gouw and Warneke, 2006). Additionally, scatter in inter-comparisons between ground-based fast time response and GC-MS systems was found to be typical (Lerner et al., 2017) and references therein). In the context of this study, the measurements should not be considered as an inter-comparison since, as described above, the inlets were approx. 5 meters apart, at different heights above ground level, with one street-side and the other above a measurement container. For these reasons, while both measurements are valid, as this comparison shows, the differences in quantification method, but also importantly instrument location and set-up result in substantial differences in what is being quantified so that the comparison is limited in value.

### 3.3 NMVOC Measurements – Characterization of different locations by canister sampling

The average fractional contribution to mixing ratio by compound class for each of the Neukölln, Altlandsberg, Plänterwald sites, the Tiergarten tunnel and the AVUS motorway samples is presented in Figure 6. The number of compounds included in each class was: alkanes (19), alkenes and alkynes (13), aromatics (14), oxygenated (6), and biogenics and their oxidation products (5; referred to as 'biogenics' for simplicity). For a complete list of the compounds and their grouping, see the supplemental information. In the following text and figures two extremely high values for acetone were removed (one sample from the Neukölln station, and one from the Altlandsberg samples). Since these two values were extreme outliers, their origin remains unclear. Therefore we have removed them from the averages and treated them separately. (Text is included in the SI to demonstrate how these two values change the results presented here.) The largest contributions of the quantified VOCs to mixing ratio were from the alkanes (27 - 41 %) and oxygenated (23 - 55 %) compounds. Biogenics were always a minor contribution to mixing ratio, but their contribution was largest in the Plänterwald samples (11 %) and negligible at the two traffic locations. Alkenes/alkynes and aromatics showed the largest contribution to mixing ratio at the traffic sites, at 17 - 23 % and 14 %, respectively. The highest total NMVOC mixing ratio of those compounds measured here was found at the traffic sites (Tiergarten tunnel,  $64 \pm 17$  ppbv; AVUS

Field Code Changed

Field Code Changed

motorway,  $170 \pm 82$  ppbv; average mixing ratio  $\pm$  standard deviation among the samples). The total mixing ratios of the 57 measured compounds at Altlandsberg and at the urban background station in Neukölln, showed similar results, with an average mixing ratio and standard deviation of  $14 \pm 6.4$  ppbv and  $19 \pm 5.6$  ppbv, respectively. The mixing ratios found in Plänterwald were similar to the urban background location, with an average of  $17 \pm 3.4$  ppbv, although with a larger contribution from biogenics. In comparison, total NMHC mixing ratios for urban background in Paris during the MEGAPOLI winter campaign was 12 ppbv (midnight median levels) or 17 ppbv (maximum of median daily values), with somewhat lower mixing ratios measured during the summer campaign (Dolgorouky et al., 2012; Ait-Helal et al., 2014).

Previously, a measurement campaign was carried out during June-August of 1996 in Berlin, during which samples were taken at the Neukölln urban background station, as well as at a traffic station on Frankfurter Allee. During this campaign, VOC measurements were taken 4 times a day for 2 hours over the course of one week (7 days) of each month using bag samples, adsorption tubes and DNPH cartridges and analyzed by gas-chromatography (Thijssse et al., 1999). This provides a good basis for comparison to the NMVOCs measured by canister sampling (most similar in method) during this campaign almost 20 years later. Overall, the mixing ratios for most compounds that were measured in both projects at the urban background location in Neukölln were lower now than in 1996 (Figure 7). For the traffic locations the results are less clear. Given that the Frankfurter Allee monitoring station is a traffic station, these measurements would likely be more comparable to the Tiergarten Tunnel measurements of this study, rather than those samples taken during a traffic jam on the AVUS motorway where concentrations were extremely elevated. Indeed, the mixing ratios measured during the traffic jam were found to be higher in most cases than those measured in 1996 at Frankfurter Allee. However, the comparison between the Tiergarten Tunnel measurements and Frankfurter Allee showed much more similar results to those of the urban background station comparison, with concentrations generally being lower today than ~~ea-~~approx. 20 years ago (Thijssse et al., 1999).

There are a couple of exceptions in this comparison, where the mixing ratios measured in this campaign stand out as substantially higher than those measured 20 years ago. Considering only those few compounds that have a ratio of 0.6 or less for the average mixing ratio in 1996 relative to that in 2014, the biogenic contributions in Neukölln (isoprene (0.3), methylvinylketone (0.1)) show increases. These increases may be attributable to changes in vegetation around the measurement site. Other NMVOCs, such as cis-2-butene and cyclopentane showed increases for both the urban background site and traffic site (Tiergarten Tunnel vs Frankfurter Allee). Other compounds, such as cis-2-pentene and trans-2-butene (traffic site) and 1,2,3-trimethylbenzene (urban background) showed increases at only the one site type. While the literature on trends of NMVOCs is limited, data from a traffic site in London, a rural background site in the UK, and a remote site in Germany showed that over the period from 1998-2009 all individual NMVOCs evaluated (with the exception of n-heptane at the rural background site) were decreasing, with stronger decreases observed at the traffic site relative to the other site types (von Schneidmesser et al., 2010). Similarly, an evaluation of C2-C8 hydrocarbon data, as total HCs and by compound class, for a number of sites across the UK from 1994-2012, also documented decreases across all compound classes (Derwent et al., 2014). Finally, a broader evaluation of the trends in anthropogenic NMVOC emissions across Europe also documented a decrease between 2003 and 2012 (EEA, 2014, 2016). As such, the existing literature does not provide any detailed documentation that might be able to address the potential increases in those few compounds here where an increase was observed. Furthermore, longer-term sampling may show that the increases documented here do not reflect the long-term trend.

Field Code Changed

### 3.4 OH Reactivity

To better understand the role of these compounds with respect to their role in ozone formation and atmospheric reactivity, the reactivity with respect to OH ( $R_{OH}$ ) was calculated. These results are shown in Figure 6 and parallel the results presented for the mixing ratios. In all cases, including other studies discussed, the values presented are calculated OH reactivity based on measurements of NMVOCs and not OH reactivity that was measured directly. The relative importance of the biogenics, alkenes and alkynes, and to a lesser extent the aromatics increased when considering OH reactivity as is visible in Figure 6 (for a complete list of compounds included in these classes, see the SI). The largest contribution to OH reactivity was from either the biogenics and their oxidation products (0-75%) or the alkenes and alkynes (10-55%), depending on the location, with the alkenes and alkynes dominating at the traffic locations, where the biogenic contribution was negligible. The NMVOCs included in each of these categories are provided in [Section Table S1](#). The contribution to OH reactivity from alkanes ranged from 4% (Plänterwald) to 18% (AVUS motorway). ~~While the~~ contribution from oxygenated compounds, despite their substantial contribution to mixing ratio, ranged from only 5-13% of OH reactivity. ~~That said, only 6 oxygenated NMVOCs (of 57 total NMVOCs) were included here, and a recent study by Karl et al., (2018) found an appreciably greater fraction of oxygenated NMVOCs in urban areas than previous studies identified. The molar flux of oxygenated NMVOCs being actively emitted into the urban atmosphere from measurements in Europe was found to be  $56 \pm 10\%$  relative to the total NMVOC flux (Karl et al., 2018), which indicates that a much larger contribution from oxygenated NMVOCs is possible if different measurement techniques are used. Furthermore,~~ the contribution to the biogenic OH reactivity at Plänterwald originated largely from isoprene (88%), with 7% from  $\alpha$ - and  $\beta$ -pinene. Similar contributions were found at Neukölln and Altlandsberg. The mean (median [25<sup>th</sup>, 75<sup>th</sup> percentile]) total OH reactivity from the 57 species was  $2.6 \text{ s}^{-1}$  ( $2.6 [2.1, 3.0] \text{ s}^{-1}$ ) at Neukölln, and ranged from  $2.2 \text{ s}^{-1}$  ( $2.2 [1.5, 2.8] \text{ s}^{-1}$ ) at Altlandsberg to  $34 \text{ s}^{-1}$  ( $34 [29, 39] \text{ s}^{-1}$ ) from the AVUS motorway. ~~While studies have shown that a number of NMVOCs, such as isoprene, or other terpenes can also have anthropogenic sources (Derwent et al., 2007; Reimann et al., 2000), we treat them as biogenic and do not try to tease apart the biogenic vs potential anthropogenic contributions in this context.~~

An earlier study (BERLIOZ) also made measurements of  $C_2$ - $C_{12}$  NMHCs in Berlin and at sites in the surrounding area, mostly focused on the production of ozone in downwind locations of the city (Winkler et al., 2002; Volz-Thomas et al., 2003; Becker et al., 2002). They report OH reactivity for two sites outside of Berlin, Blossin (~~ea-approx.~~ 15-20 km southeast of the Berlin city boundary) and Pabsthum (~~ea-approx.~~ 30-35 km northwest of the Berlin city boundary). The total OH reactivity reported at these sites range between  $1 - 7 \text{ sec}^{-1}$  and ~~ea-approx.~~  $0.25 - 2 \text{ sec}^{-1}$ , respectively. These are similar to those values found at the urban background locations in Berlin, with the most comparable location being Altlandsberg ( $2.2 \text{ s}^{-1}$ ). The contribution from isoprene to the OH reactivity was found to be 70% at Blossin and 51% at Pabsthum, on average, although during the passing of a city plume at Pabsthum 46% of reactivity was contributed by isoprene, with the remaining contribution attributed to anthropogenic NMHCs (Winkler et al., 2002).

The total OH reactivity values of measured VOCs in Berlin ( $2.6 \text{ s}^{-1}$ ) are similar to the average total OH reactivity from VOCs observed in other European cities, such as Paris (~~ea-approx.~~  $4.0 \text{ s}^{-1}$ ) and London ( $1.8 \text{ s}^{-1}$ ) (Dolgorouky et al., 2012; Whalley et al., 2016), and, not surprisingly, lower than those observed at cities in the Pearl River Delta region of China ( $8-14 \text{ s}^{-1}$ ). Specifically, Liu et al. (2008) reported OH reactivity from a measurement campaign in Ghangzhou and Xinken during one month in the autumn of 2004. The OH reactivity

Field Code Changed

575 from alkanes, alkenes, and aromatics from Ghangzhou was reported to be  $1.9 \pm 1.5 \text{ s}^{-1}$ ,  $8.8 \pm 6.8 \text{ s}^{-1}$ , and  $2.9 \pm$   
576  $2.7 \text{ s}^{-1}$ , respectively. In all cases, these values are about one order of magnitude greater than those calculated for  
577 the urban background locations during this campaign (see Table 2). The level for isoprene ( $0.5 \pm 0.4 \text{ s}^{-1}$ )  
578 however, was much more similar to the OH reactivity reported for the biogenics at the urban background  
579 locations in this study. In London, OH reactivity of alkanes, alkenes+alkynes, aromatics, and biogenics was  
580 reported to be  $0.81 \text{ s}^{-1}$ ,  $0.47 \text{ s}^{-1}$ ,  $0.235 \text{ s}^{-1}$ , and  $0.25 \text{ s}^{-1}$ , respectively, which are values much more similar to those  
581 in this study (Whalley et al., 2016). The relative importance of alkanes and alkenes+alkynes was the reverse for  
582 London compared to Berlin.

Field Code Changed

583 In the MEGAPOLI winter campaign in Paris, total calculated mean OH reactivity was reported to be  
584  $17.5 \text{ s}^{-1}$ , although this included not only NMVOCs, but also methane, CO, NO, and NO<sub>2</sub> (Dolgorouky et al.,  
585 2012). The OH reactivity attributed to the 29 non-methane hydrocarbons and oxygenated VOCs was 23% ( $4.0 \text{ s}^{-1}$ )  
586 of the total, somewhat higher than those values reported here (57 NMVOCs) for the urban background  
587 locations. Comparing to the OH reactivity values in Berlin is difficult, since for the winter campaign in Paris,  
588 Ait-Helal et al. (2014) report that the concentrations of the VOCs are generally shown to be lower during  
589 summer, specifically for many of the anthropogenic compounds, although this does vary by compound.  
590 Therefore, the OH reactivity values for Paris considered here should be considered an upper limit for the  
591 comparison with this study. The calculated mean OH reactivity attributed to NO and CO was  $1.75 \text{ s}^{-1}$  each, and  
592  $9.63 \text{ s}^{-1}$  for NO<sub>2</sub> in Paris (Dolgorouky et al., 2012). By comparison, the mean OH reactivity calculated for  
593 August (to match the time during which the canister samples were taken at Neukölln) was  $0.58 \pm 1.2 \text{ s}^{-1}$  and  $0.87$   
594  $\pm 0.30 \text{ s}^{-1}$  for NO and CO, respectively, and  $4.5 \pm 3.0 \text{ s}^{-1}$  for NO<sub>2</sub>, which is again, lower, as with the VOCs, but  
595 not unreasonable given the context of the comparison.

Field Code Changed

Field Code Changed

Field Code Changed

596 Finally, while the 57 NMVOCs included here to calculate OH reactivity were chosen to facilitate  
597 comparison to previous studies, a more exhaustive list could change the picture. For example, as mentioned  
598 above, the limited number of oxygenated NMVOCs measured would likely lessen the contributions of the other  
599 compound classes. As an example, adding six additional oxygenated NMVOCs (propanal, 2-butanol, 1-propanol,  
600 butanal, 1-butanol, pentanal) increased the total average OH reactivity between  $0.12 \text{ s}^{-1}$  (Plänterwald) to  $1.7 \text{ s}^{-1}$   
601 (AVUS Motorway). The percent contribution of these six oxygenated NMVOCs ranges between 2.5% and 9.3%  
602 of the new total OH reactivity. In contrast, a similar analysis that included three additional biogenic NMVOCs  
603 (limonene, sabinene, eucalyptol) showed much smaller additional reactivity, never more than  $0.02 \text{ s}^{-1}$ . These  
604 compounds also were not consistently present across all samples.

Formatted: Superscript

Formatted: Superscript

Formatted: Superscript

#### 605 606 3.4.1 OH reactivity – direct comparison to a previous study in London and Paris

607 As a comparison to the R<sub>OH</sub> estimates calculated for London and Paris based on ~~ea-approx.~~ 10 years of  
608 monitoring data through 2009 (von Schneidemesser et al., 2011), a subset of the NMVOCs was taken to enable a  
609 more equal comparison to the values reported for summer (JJA) in that study. The only difference in the  
610 compounds included is the contribution of n-butane, which was not included in the Berlin calculations because  
611 of a local source of contamination (in London the contribution of n-butane to OH reactivity from this subset of  
612 NMVOCs was ~~ea-approx.~~ 5% or less). The referenced study was focused on the contribution of biogenics,  
613 specifically isoprene, to OH reactivity. At the London Eltham site (urban background) isoprene contributed 25%  
614 to the OH reactivity for summer and 16% at Paris Les Halles, also an urban background location (24 total  
615 NMVOCs, including 9 alkanes, 9 alkenes/alkynes, 5 aromatics, 0 oxygenated, 1 biogenic) (von Schneidemesser

Field Code Changed

Field Code Changed



et al., 2011). Using the reduced, matched set of compounds, isoprene accounts for 37% of OH reactivity at the Neukölln location on average, and as much as 82% at the Plänterwald (urban park) location in Berlin. The Neukölln urban background location values are a bit higher than those in London and Paris, although not dramatically different. The Plänterwald urban park location however, demonstrates the importance of such areas for the biogenic influence on OH reactivity, especially considering that even at Harwell, a rural background location west of London in the UK, isoprene contributes on average only 10% of OH reactivity. Although, as pointed out in the study, this is likely an underestimation of the biogenic importance given that only isoprene is included and for northerly regions other biogenics, such as monoterpenes may play a more important role (von Schneidemesser et al., 2011).

### 3.5 PM<sub>10</sub> Filters

#### 3.5.1 Bulk composition and HYSPLIT back trajectories

The PM<sub>10</sub> filters were analyzed for water soluble and water insoluble OC, EC, and ions. In addition, filter samples were grouped to ensure enough mass for analysis of organic molecular markers. The groups were informed by the bulk composition analysis results, including the ratio of water soluble to total OC and the ratio of ions to OC, and HYSPLIT back trajectories. Back trajectories were evaluated to provide information on the origin of the air masses and source-receptor relationships (Stein et al., 2015). The results of this bulk composition analysis are shown in Figure 8. Select individual filters that had sufficient mass and did not fit with any of the other groups were analyzed individually (B17, B19, B30). All values listed for groups are an average of the results from the filters included in the group. The air mass origins as per HYSPLIT are summarized in Table 3 (see also Figure S4).

Groups A, B, C, and D show significant similarity in their percent of OC that is WSOC, which ranges from 27 to 34%. The ratio of ions (sulfate, nitrate, ammonium) to OC is however, very different. Groups B and C have an ions:OC ratio of 1.2 and 0.98, while groups A and D have ratios of 0.56 and 0.50, respectively. The PM<sub>10</sub> mass loadings for B (20 µg m<sup>-3</sup>) and C (24 µg m<sup>-3</sup>) were lower than for A (27 µg m<sup>-3</sup>) and D (35 µg m<sup>-3</sup>), see Table 3. ~~The back trajectories (Figure S4) show that prior to arriving in Berlin, the air masses primarily passed over Germany for group A. While some additional filters fit the general patterns outlined here, the number of filters included in the group was reduced to focus more on back trajectories in the group that originated from over Germany itself. The air masses that characterize group D originated from the Northeast, passing over the Baltic coast and Poland before arriving in Berlin. For group B the air masses originated from the West over the Atlantic (not further than 20 degrees W) and passed over northern France, the BeNeLux region and central Germany before arriving in Berlin. For group C, the air masses originated from the North West, over the North Sea as far as Iceland, passing between the UK and the Scandinavian Peninsula before arriving in Berlin. Both B and C had higher concentrations of sodium and nitrate than A and D, while A and D had higher concentrations of OC and marginally higher concentrations of sulfate than B and C (Figure 8). The concentrations of EC ranged between 1.1 and 1.9 µg m<sup>-3</sup> but did not group as with the other species, with the lowest concentration in group B and the highest in group C.~~

Group E had a very low percent of WSOC (19%) and an ions:OC ratio of 0.59. It also had the lowest PM<sub>10</sub> mass (20 µg m<sup>-3</sup>), and either the lowest or among the lowest concentrations for all ions. The OC concentration however, was 5.5 µg m<sup>-3</sup>, which was roughly in the middle of the OC concentrations measured,

Field Code Changed

Field Code Changed



while the EC concentration was also the lowest at  $0.71 \mu\text{g m}^{-3}$ . ~~The air masses originated from the North, passing over Scandinavia, the North Sea, or the UK before arriving in Berlin.~~

B17, B19, and B30 were analyzed individually because their bulk composition analysis and back trajectory patterns did not group well with the others, and sufficient mass was available for tracer analysis without needing to composite filters (Table 3, Figure 8). B17 and B30 had a higher percent WSOC (66% and 56%, respectively), and ions:OC ratios of 1.3 and 2.4, respectively. 37% of OC was WSOC for B19, and the ions:OC ratio was 0.77. Total  $\text{PM}_{10}$  mass was  $38.8 \mu\text{g m}^{-3}$ ,  $31.0 \mu\text{g m}^{-3}$ , and  $39.5 \mu\text{g m}^{-3}$ , and OC concentrations were  $7.0 \mu\text{g m}^{-3}$ ,  $5.9 \mu\text{g m}^{-3}$ , and  $3.9 \mu\text{g m}^{-3}$ , for B17, B19, and B30, respectively. All three samples had significantly larger contributions from sulfate, and to a lesser extent also higher ammonium, compared to the other groups. B30 also has a large amount of nitrate in contrast to all other samples, and somewhat higher concentrations of potassium and sodium as well. B17 had the highest concentration of EC ( $2.3 \mu\text{g m}^{-3}$ ) of all samples.

There were significant concentrations of sulfate across all samples, ranging from  $1.2\text{--}6.0 \mu\text{g m}^{-3}$ , but particularly so in B17, B19, and B30. Sulfate is typically attributed to industrial sources, as the content of sulfate in fuels has been reduced significantly and is now quite low (Villalobos et al., 2015). Sea-salt is in this case not likely as a source, as Berlin is not within close proximity of a coastal region where such components are typically identified (Putaud et al., 2004). In general the significant contributions of sulfate, nitrate, and ammonium are indicative of a secondary inorganic aerosol (ammonium sulfate and ammonium nitrate) (Putaud et al., 2004; Schauer et al., 1996). Previous work has shown that secondary inorganic aerosol over northwestern Europe, including Germany, contribute significantly – about 50% – to the  $\text{PM}_{10}$  concentrations (Banzhaf et al., 2013). Two studies by Putaud et al. (Putaud et al., 2004; Putaud et al., 2010) summarize the relative contribution of major constituent chemical species to PM mass, including for near-city and urban background locations. In comparison to the numbers cited in that study (2004 all European sites; 2010 north-western European sites), the percent contribution of nitrate (15%; 14%), ammonium (7%; not listed), and sulfate (13%; 14%) to  $\text{PM}_{10}$  mass at the urban background site in Berlin were quite similar, ranging from 1–11% (nitrate), 1–5% (ammonium), and 6–16% (sulfate) in Berlin.

The back trajectories (Figure S4) show that prior to arriving in Berlin, the air masses primarily passed over Germany for group A. While some additional filters fit the general patterns outlined here, the number of filters included in the group was reduced to focus more on back trajectories in the group that originated from over Germany itself. The air masses that characterize group D originated from the Northeast, passing over the Baltic coast and Poland before arriving in Berlin. For group B the air masses originated from the West over the Atlantic (not further than 20 degrees W) and passed over northern France, the BeNeLux region and central Germany before arriving in Berlin. For group C, the air masses originated from the North West, over the North Sea as far as Iceland, passing between the UK and the Scandinavian Peninsula before arriving in Berlin. Both B and C had higher concentrations of sodium and nitrate than A and D, while A and D had higher concentrations of OC and marginally higher concentrations of sulfate than B and C (Figure 8). ~~The air masses of Group E originated from the North, passing over Scandinavia, the North Sea, or the UK before arriving in Berlin.~~ The back trajectories associated with B17 and B19 both passed over Poland before arriving in Berlin, with the air masses associated with B19 extending more northward as well. For B30 the air originates from the West with some passing over northern France, but mostly comes from over Germany itself. The significant presence of ammonium and sulfate likely indicates influence of agriculture, as ammonium sulfate is commonly used in

Field Code Changed

Field Code Changed

697 fertilizer and more than 95% of NH<sub>3</sub> emissions in Europe originate from agriculture (Harrison and Webb,  
698 2001;Backes et al., 2016;EEA, 2016). ~~B20 also has a large amount of nitrate in contrast to all other samples, and~~  
699 ~~somewhat higher concentrations of potassium and sodium as well. B17 had the highest concentration of EC (2.3~~  
700 ~~µg m<sup>-3</sup>) of all samples.~~

701 ~~There were significant concentrations of sulfate across all samples, ranging from 1.2-6.0 µg m<sup>-3</sup>, but~~  
702 ~~particularly so in B17, B19, and B20. Sulfate is typically attributed to industrial sources, as the content of sulfate~~  
703 ~~in fuels has been reduced significantly and is now quite low (Villalobos et al., 2015). Sea salt is in this case not~~  
704 ~~likely as a source, as Berlin is not within close proximity of a coastal region where such components are~~  
705 ~~typically identified (Putaud et al., 2004). In general the significant contributions of sulfate, nitrate, and~~  
706 ~~ammonium are indicative of a secondary inorganic aerosol (ammonium sulfate and ammonium nitrate) (Putaud~~  
707 ~~et al., 2004;Schauer et al., 1996). Previous work has shown that secondary inorganic aerosol over northwestern~~  
708 ~~Europe, including Germany, contribute significantly—about 50%—to the PM<sub>10</sub> concentrations (Banzhaf et al.,~~  
709 ~~2013). Two studies by Putaud et al. (Putaud et al., 2004;Putaud et al., 2010) summarize the relative contribution~~  
710 ~~of major constituent chemical species to PM mass, including for near city and urban background locations. In~~  
711 ~~comparison to the numbers cited in that study (2004 all European sites; 2010 north-western European sites), the~~  
712 ~~percent contribution of nitrate (15%; 14%), ammonium (7%; not listed), and sulfate (13%; 14%) to PM<sub>10</sub> mass at~~  
713 ~~the urban background site in Berlin were quite similar, ranging from 1-11% (nitrate), 1-5% (ammonium), and 6-~~  
714 ~~16% (sulfate) in Berlin.~~

### 715 3.5.2 Organic molecular markers

716 The concentrations by composited sample are shown in Figure 9 for the organic molecular markers.  
717 Levoglucosan has been established as a molecular marker for biomass burning (Simoneit et al., 1999). The  
718 concentrations measured here ranged from 15-60 ng m<sup>-3</sup>. While high concentrations of levoglucosan in urban  
719 areas are often associated with residential wood combustion during colder months, it can also be owing to crop  
720 burning, wild fires, coal combustion and/or long-range transport of smoke from biomass burning (Simoneit,  
721 2002;Zhang et al., 2008;Shen et al., 2016). The concentrations measured during this summer campaign in Berlin  
722 were similar to those measured in PM<sub>10</sub> from other European cities during summertime, and ~~ea-approx.~~ an order  
723 of magnitude lower than concentrations observed in winter (Caseiro and Oliveira (2012) and references therein).  
724 The study by Caseiro and Oliveira (2012) confirms the likelihood of agricultural residue burning and/or wildfires  
725 as a summertime source for levoglucosan.

726 Alkanes are useful tracers to distinguish between fossil fuel sources and vegetative detritus. This  
727 distinction is informed by the odd-even carbon number predominance, specifically of the C<sub>29</sub>, C<sub>31</sub>, and C<sub>33</sub> *n*-  
728 alkanes to indicate plant material as a source (Rogge et al., 1993). As is visible in Figure 9, the concentrations of  
729 those odd *n*-alkanes are much greater than the corresponding even *n*-alkanes. Furthermore, the carbon preference  
730 index (CPI) was calculated for the samples using the C<sub>29</sub>-C<sub>33</sub> *n*-alkanes and ranged from 1.9-5.5, with an average  
731 of 3.6. CPI values of ~~ea-approx.~~ 1 are indicative of fossil fuel emission sources, whereas values of ~~ea-approx.~~ 2  
732 or greater are indicative of biogenic detritus (Simoneit, 1986), as is clearly the case for these samples.

733 Hopanes have been established as markers for diesel and gasoline vehicle emissions, stemming from  
734 petroleum product utilization and lubricating oil used in vehicles (Schauer et al., 1996;Rushdi et al.,  
735 2006;Simoneit, 1984). The concentrations of the two hopanes measured here and included in the CMB analysis  
736 ranged from 0.04-0.13 ng m<sup>-3</sup> as shown in Figure 9.

Field Code Changed

Polycyclic aromatic hydrocarbons (PAHs) are formed and emitted most typically during the incomplete combustion of fossil fuels or wood (Ravindra et al., 2008). The concentrations measured during this study ranged from 0-0.23 ng m<sup>-3</sup> for the individual PAHs shown in Figure 9. These concentrations are similar to, although on the lower end, of those measured in a study in Flanders, Belgium, including measurements at urban locations (Ravindra et al., 2006). Generally, PAH concentrations are lower in summertime owing to lower emissions and shorter lifetimes. The measurements here were conducted during summer, while the measurements in the study in Flanders covered more seasons. To distinguish between sources, PAH concentration profiles or ratios are used. For example, a ratio of benzo(b)fluoranthene to benzo(k)fluoranthene of greater than 0.5 has been identified as an indicator for diesel emissions sources (Park et al., 2002; Ravindra et al., 2008). In this study the ratio ranged from 1.9 to 7.2, indicating a strong influence of diesel emissions for these compounds.

### 3.5.3 Chemical Mass Balance

The molecular markers analyzed in the organic carbon fraction of the PM<sub>10</sub> samples were used to conduct source apportionment analysis using chemical mass balance. The total OC for these samples ranged from 2.99 to 7.21 µg m<sup>-3</sup>. The amount of OC mass apportioned in the CMB analysis ranged from 21% to 49%. The source profiles included in the model to which OC was attributed includes vegetative detritus, diesel emissions, gasoline vehicle emissions, and wood burning. In addition, a fraction of the unapportioned OC was attributed to secondary organic aerosol based on the unapportioned fraction of water soluble OC and the amount attributed to wood burning, following Sannigrahi et al. (2006). The source contributions to OC, as well as the fitting statistics are listed in Table 4, and shown in Figure 10.

For B17, B19, and B30 the SOA fraction is higher than for any of the others, at 63%, 34%, and 49% of OC, respectively. They also had the highest concentrations of levoglucosan, ranging from 37.8 to 60.1 ng m<sup>-3</sup>. As the primary tracer for biomass burning, these three samples also had the largest concentrations attributed to this source, ranging from 0.22 to 0.44 µg m<sup>-3</sup> of OC, but the relative contribution was only larger for B30 at 11%. All other samples had contributions that ranged between 2% and 4% of OC. These three samples had air masses that originated over Poland (B17, B19) and Germany (B30), indicating a more local-regional source for the biomass burning. The higher concentrations of potassium in these samples, also an indicator for biomass burning (Andreae, 1983), provides additional confirmation. The relatively high concentrations of ammonium and sulfate in these samples may indicate an agricultural influence. Those samples originating from regions to the West/North had somewhat lower concentrations overall relative to those originating from regions to the East/North, as shown in Figure 10.

The contribution of diesel emissions ranged from 0.24 - 0.81 µg m<sup>-3</sup>, corresponding to 4 - 21% of OC fraction. The highest fractional contribution was found in GRC (concentration 0.74 µg m<sup>-3</sup>) (air masses originating over the North Sea), while the highest concentration was found in sample B17 (fractional contribution 12%) (from Poland to the East). The diesel from GRC could also have its origin in shipping emissions, as well as diesel vehicles. High contributions of diesel did not necessarily correspond to high contributions of gasoline vehicle emissions, which were lower than the contributions from diesel and ranged from 0.11 - 0.28 µg m<sup>-3</sup> and 2 - 7% of OC. The highest contribution in terms of fractional contribution and concentration was found in B30. Furthermore, it should be noted that the source profiles reflect primary organic aerosol emissions, and therefore the secondary aerosol produced from these vehicular sources, which has been

Field Code Changed

shown to be substantial in many cases, depending on the control technologies in use (Gordon et al., 2014a; Gordon et al., 2014b), is not reflected in these attributions.

Field Code Changed

Field Code Changed

The contribution of vegetative detritus was among the largest source contributions and ranged from 0.51 - 1.4  $\mu\text{g m}^{-3}$  (11-20%). The relative importance of this source is reflected in the concentrations of the alkanes, as shown in Figure 9, and their average CPI of 3.6. The largest contribution was found for GRD with air masses originating over the North Sea.

For all samples, a significant amount of secondary organic aerosol was calculated, 0.87 - 4.4  $\mu\text{g m}^{-3}$  (18 - 63%). While this was the contribution to OC, high concentrations of secondary inorganics (sulfate, ammonium, nitrate) support the aging of the air masses and the potential for this a significant contribution from secondary aerosol overall.

It should be noted that ambient air samples include contributions from both local sources as well as emissions that have been transported from locations further away. While the back trajectory analysis is more relevant for interpreting the influence of emissions from the surrounding region, a comparison to the Berlin emission inventory reflects on the influence of local source contributions. Both play a role, but neither capture the complete picture, with limitations in both cases, as discussed further below.

#### 3.5.4 Source apportionment – emission inventory comparison

The source apportionment results were compared to the emissions inventory (EI) from TNO-MACC III (Kuenen et al., 2014). The grid cells for Berlin were extracted and the percent of total emissions for OC by source category for the Berlin area for June, July, and August as a rough comparison to the source apportionment results was calculated. Both diesel and gasoline vehicle exhaust sources have significant contributions, although diesel contributes ea-approx. 19% to total OC emissions in the inventory, whereas gasoline vehicles contribute only about 1%. Biogenic sources are not included in the inventory. If we focus on the primary sources from the source apportionment results, the diesel and gasoline vehicles contribute a significant fraction, with diesel comprising a larger fraction than gasoline vehicles, as in the inventory. The inventory also includes significant contributions from road transport originating from road, brake, and tire wear, which are not reflected in the CMB results, owing to the profiles used. About 8% of OC emissions are attributed to agriculture in the EI. This could contribute to both the biomass burning and vegetative detritus sources; the presence of significant secondary ammonium and nitrate also indicates an agricultural influence, even though this does not show up in the OC CMB. In all cases, these primary sources will contribute to secondary inorganic and organic aerosol formation. The contributions from non-industrial combustion and energy and other industries are not captured as primary source contributions in the CMB model. Overall, the comparison between the source apportionment results and the EI is a non-ideal comparison given the differences in methodology and the difference in terms of primary vs secondary sources that are or are not included. More specifically, the EI provides primary emissions estimates for a year for all Berlin grid cells (Kuenen et al., 2014), while the CMB results provide source attribution to ambient concentrations including primary and secondary sources for 3 months of summer at one location in Berlin. However, one would expect that general patterns are captured for significant sources, as it was for vehicle emissions, and the indication of agriculture.

Field Code Changed

Field Code Changed

## 4 Conclusions

The data presented here provide an overview of the stationary measurements conducted during the BAERLIN2014 campaign. Of the three main aims of the campaign, two were addressed here, including (1) characterization of gaseous and particulate pollution, including source attribution, in the Berlin-Potsdam area, (2) quantification of the role of natural sources, especially vegetation, in determining levels of gaseous pollutants such as ozone. PM<sub>10</sub> concentrations and the contributions from inorganic species, such as nitrate, sulfate, and ammonium that contribute substantially (10-24%) to secondary aerosol were found to be similar in terms of their relative contribution to PM<sub>10</sub> in other European cities. Both the PM and gas-phase pollutants exhibited diurnal cycles indicative of anthropogenic sources, and the ratio of benzene to toluene indicated the influence of fresh, local emissions. Comparison of canister samples taken over the course of a day showed similarities which would seem to imply an urban background level for many NMVOC species. In addition to the secondary inorganic aerosol, a significant fraction of OC was attributed to secondary organic aerosol (18-63%) in the CMB analysis.

The influence of vegetation and biogenic emissions was demonstrated in the canister sample analysis, as well as the CMB results where vegetative detritus comprised one of the larger sources contributing to the OC fraction ranging from 11 to 20%. While the detected mixing ratios of the biogenic NMVOCs did not contribute significantly to the total NMVOC mixing ratio, the role in e.g., ozone formation, assessed by calculating OH reactivity, was much more significant. Biogenics and their oxidation products accounted for 31% of the OH reactivity at the urban background station in Neukölln and 75% at the urban park location (Plänterwald), demonstrating the importance of urban parks for biogenic emissions. These contributions from biogenics were higher than those found at comparable urban background locations in London and Paris. This is likely linked to the relatively high amount of land surface area in Berlin which is covered by vegetated areas (34%). It should however, be acknowledged that only a subset of the total NMVOCs were measured. If the 'missing' NMVOCs were measured this could influence the results, including the contribution of biogenics and other compound classes to OH reactivity.

As an outlook, future research could build on this work to include additional analysis of PTR-MS data using positive matrix factorization to investigate the sources influencing NMVOC concentrations at the Neukölln location, as well as modeling studies to gain greater insight as to the impact of urban vegetation on ozone formation, both yielding further insight into the importance of biogenic VOCs in urban environments.

## 5 Data availability

The datasets generated during and/or analysed during the current study are available from the corresponding author on request.

## 6 Acknowledgements

This work was hosted by IASS Potsdam, with financial support provided by the Federal Ministry of Education and Research of Germany (BMBF) and the Ministry for Science, Research and Culture of the State of Brandenburg (MWFK). The authors would like to thank Hugo Denier van der Gon and Jeroen Kuenen (TNO) for providing information pertaining to the TNO-MACCIII inventory and Friderike Kuik for the Berlin emissions processing; Christoph Munkel from Vaisala GmbH, Hamburg for support with ceilometer CL51 data analyses to determine mixing layer heights; Wolfram Birmili (UBA), Alfred Wiedensohler, and Kay Weinhold (TROPOS) for discussions informing the particle measurements, colleagues at the IASS for their support of the campaign and discussions that helped shape the manuscript. The authors gratefully acknowledge the NOAA Air

859 Resources Laboratory (ARL) for the provision of the HYSPLIT transport and dispersion model and/or READY  
860 website (<http://www.ready.noaa.gov>) used in this publication. Boris Bonn highly acknowledges a grant from the  
861 IASS to support the studies.  
862  
863  
864

865

## Bibliography

Formatted: English (U.S.)

866

867 Ait-Helal, W., Borbon, A., Sauvage, S., de Gouw, J. A., Colomb, A., Gros, V., Freutel, F., Crippa, M., Afif,  
868 C., Baltensperger, U., Beekmann, M., Doussin, J. F., Durand-Jolibois, R., Fronval, I., Grand, N.,  
869 Leonardis, T., Lopez, M., Michoud, V., Miet, K., Perrier, S., Prévôt, A. S. H., Schneider, J., Siour, G.,  
870 Zapf, P., and Locoge, N.: Volatile and intermediate volatility organic compounds in suburban Paris:  
871 variability, origin and importance for SOA formation, *Atmos. Chem. Phys.*, 14, 10439-10464,  
872 10.5194/acp-14-10439-2014, 2014.

873 Andreae, M. O.: Soot carbon and excess fine potassium: long-range transport of combustion-derived  
874 aerosols, *Science (New York, N.Y.)*, 220, 1148-1151, 10.1126/science.220.4602.1148, 1983.

875 Backes, A. M., Aulinger, A., Bieser, J., Matthias, V., and Quante, M.: Ammonia emissions in Europe,  
876 part II: How ammonia emission abatement strategies affect secondary aerosols, *Atmos. Environ.*,  
877 126, 153-161, <http://dx.doi.org/10.1016/j.atmosenv.2015.11.039>, 2016.

Formatted: English (U.S.)

Field Code Changed

Formatted: English (U.S.)

878 Banzhaf, S., Schaap, M., Wichink Kruit, R. J., Denier van der Gon, H. A. C., Stern, R., and Builtjes, P. J.  
879 H.: Impact of emission changes on secondary inorganic aerosol episodes across Germany, *Atmos.*  
880 *Chem. Phys.*, 13, 11675-11693, 10.5194/acp-13-11675-2013, 2013.

881 Becker, A., Scherer, B., Memmesheimer, M., and Geiß, H.: Studying the city plume of Berlin on 20 July  
882 1998 with three different modelling approaches, *Journal of Atmospheric Chemistry*, 42, 41-70,  
883 10.1023/A:1015776331339, 2002.

884 Birmili, W., Weinhold, K., Rasch, F., Sonntag, A., Sun, J., Merkel, M., Wiedensohler, A., Bastian, S.,  
885 Schladitz, A., Löschau, G., Cyrys, J., Pitz, M., Gu, J., Kusch, T., Flentje, H., Quass, U., Kaminski, H.,  
886 Kuhlbusch, T. A. J., Meinhardt, F., Schwerin, A., Bath, O., Ries, L., Gerwig, H., Wirtz, K., and Fiebig, M.:  
887 Long-term observations of tropospheric particle number size distributions and equivalent black  
888 carbon mass concentrations in the German Ultrafine Aerosol Network (GUAN), *Earth Syst. Sci. Data*,  
889 8, 355-382, 10.5194/essd-8-355-2016, 2016.

890 Blake, R. S., Monks, P. S., and Ellis, A. M.: Proton-Transfer Reaction Mass Spectrometry, *Chemical*  
891 *Reviews*, 109, 861-896, 10.1021/cr800364q, 2009.

892 Bonn, B., von Schneidmesser, E., Andrich, D., Quedenau, J., Gerwig, H., Lüdecke, A., Kura, J., Pietsch,  
893 A., Ehlers, C., Klemp, D., Kofahl, C., Nothard, R., Kerschbaumer, A., Junkermann, W., Grote, R., Pohl,  
894 T., Weber, K., Lode, B., Schönberger, P., Churkina, G., Butler, T. M., and Lawrence, M. G.:  
895 BAERLIN2014 – the influence of land surface types on and the horizontal heterogeneity of air  
896 pollutant levels in Berlin, *Atmos. Chem. Phys.*, 16, 7785-7811, 10.5194/acp-16-7785-2016, 2016.

897 Borsós, T., Řimnáčová, D., Ždímal, V., Smolík, J., Wagner, Z., Weidinger, T., Burkart, J., Steiner, G.,  
898 Reischl, G., Hitznerberger, R., Schwarz, J., and Salma, I.: Comparison of particulate number  
899 concentrations in three Central European capital cities, *Science of The Total Environment*, 433, 418-  
900 426, <http://dx.doi.org/10.1016/j.scitotenv.2012.06.052>, 2012.

Field Code Changed

Formatted: English (U.S.)

Formatted: English (U.S.)

901 Bourtsoukidis, E., Williams, J., Kesselmeier, J., Jacobi, S., and Bonn, B.: From emissions to ambient  
902 mixing ratios: Online seasonal field measurements of volatile organic compounds over a Norway  
903 spruce-dominated forest in central Germany, *Atmospheric Chemistry and Physics*, 14, 6495-6510,  
904 10.5194/acp-14-6495-2014, 2014.

905 Brauer, M., Freedman, G., Frostad, J., van Donkelaar, A., Martin, R. V., Dentener, F., Dingenen, R. v.,  
906 Estep, K., Amini, H., Apte, J. S., Balakrishnan, K., Barregard, L., Broday, D., Feigin, V., Ghosh, S., Hopke,  
907 P. K., Knibbs, L. D., Kokubo, Y., Liu, Y., Ma, S., Morawska, L., Sangrador, J. L. T., Shaddick, G.,  
908 Anderson, H. R., Vos, T., Forouzanfar, M. H., Burnett, R. T., and Cohen, A.: Ambient Air Pollution  
909 Exposure Estimation for the Global Burden of Disease 2013, *Environmental Science & Technology*, 50,  
910 79-88, 10.1021/acs.est.5b03709, 2016.



Caseiro, A., and Oliveira, C.: Variations in wood burning organic marker concentrations in the atmospheres of four European cities, *Journal of environmental monitoring* : JEM, 14, 2261-2269, 10.1039/c2em10849f, 2012.

Colette, A., Bessagnet, B., Vautard, R., Szopa, S., Rao, S., Schucht, S., Klimont, Z., Menut, L., Clain, G., Meleux, F., Curci, G., and Rouil, L.: European atmosphere in 2050, a regional air quality and climate perspective under CMIP5 scenarios, *Atmos. Chem. Phys.*, 13, 7451-7471, 10.5194/acp-13-7451-2013, 2013.

de Gouw, J., and Warneke, C.: Measurements of volatile organic compounds in the earth's atmosphere using proton-transfer-reaction mass spectrometry, *Mass Spectrometry Reviews*, 26, 223-257, 10.1002/mas.20119, 2006.

Derwent, R. G., Jenkin, M. E., Passant, N. R., and Pilling, M. J.: Photochemical ozone creation potentials (POCPs) for different emission sources of organic compounds under European conditions estimated with a Master Chemical Mechanism, *Atmos. Environ.*, 41, 2570-2579, <https://doi.org/10.1016/j.atmosenv.2006.11.019>, 2007.

Derwent, R. G.: New Directions: Prospects for regional ozone in north-west Europe, *Atmos. Environ.*, 42, 1958-1960, 2008.

Derwent, R. G., Darnie, J. I. R., Dollard, G. J., Dumitrean, P., Mitchell, R. F., Murrells, T. P., Telling, S. P., and Field, R. A.: Twenty years of continuous high time resolution volatile organic compound monitoring in the United Kingdom from 1993 to 2012, *Atmos. Environ.*, 99, 239-247, <https://doi.org/10.1016/j.atmosenv.2014.10.001>, 2014.

Dolgorouky, C., Gros, V., Sarda-Estève, R., Sinha, V., Williams, J., Marchand, N., Sauvage, S., Poulain, L., Sciare, J., and Bonsang, B.: Total OH reactivity measurements in Paris during the 2010 MEGAPOLI winter campaign, *Atmos. Chem. Phys.*, 12, 9593-9612, 10.5194/acp-12-9593-2012, 2012.

EC: Directive 2008/50/EC of the European Parliament and of the Council of 21 May 2008 on ambient air quality and cleaner air for Europe, in: 2008/50/EC, edited by: Union, E. P. a. t. C. o. t. E., Official Journal of the European Union, 2008.

EEA: Air quality in Europe - 2014 report, European Environment Agency, Luxembourg, 2014.

EEA: Air quality in Europe - 2016 report, European Environment Agency, Luxembourg, 2016.

Ehlers, C.: Mobile Messungen: Messung und Bewertung von Verkehrsemissionen, PhD, Mathematisch-Naturwissenschaftliche Fakultät, Universität Köln, 2013.

Ehlers, C., Klemp, D., Rohrer, F., Mihelcic, D., Wegener, R., Kiendler-Scharr, A., and Wahner, A.: Twenty years of ambient observations of nitrogen oxides and specified hydrocarbons in air masses dominated by traffic emissions in Germany, *Faraday Discussions*, 189, 407-437, 10.1039/C5FD00180C, 2016.

Emeis, S., Jahn, C., Munkel, C., Münsterer, C., and Schäfer, K.: Multiple atmospheric layering and mixing-layer height in the Inn valley observed by remote sensing, *Meteorologische Zeitschrift*, 16, 415-424, 10.1127/0941-2948/2007/0203, 2007.

Emeis, S., Schäfer, K., and Munkel, C.: Surface-based remote sensing of the mixing-layer height a review, *Meteorologische Zeitschrift*, 17, 621-630, 10.1127/0941-2948/2008/0312, 2008.

Fine, P. M., Cass, G. R., and Simoneit, B. R. T.: Chemical Characterization of Fine Particle Emissions from the Fireplace Combustion of Wood Types Grown in the Midwestern and Western United States, *Environmental Engineering Science*, 21, 387-409, 10.1089/109287504323067021, 2004.

Geels, C., Andersson, C., Hänninen, O., Lansø, A., Schwarze, P., Skjøth, C., and Brandt, J.: Future Premature Mortality Due to O<sub>3</sub>, Secondary Inorganic Aerosols and Primary PM in Europe — Sensitivity to Changes in Climate, Anthropogenic Emissions, Population and Building Stock, *International Journal of Environmental Research and Public Health*, 12, 2837, 2015.

Formatted: English (U.S.)

Formatted: English (U.S.)

Field Code Changed

Field Code Changed

Formatted: English (U.S.)

Formatted: English (U.S.)

Formatted: English (U.S.)



957 Geiß, A., Wiegner, M., Bonn, B., Schäfer, K., Forkel, R., von Schneidmesser, E., Munkel, C., Chan, K.  
 958 L., and Nothard, R.: Mixing layer height as an indicator for urban air quality?, *Atmospheric*  
 959 *Measurement Techniques*, 10, 2969-2988, 10.5194/amt-10-2969-2017, 2017.

960 Gilman, J. B., Kuster, W. C., Goldan, P. D., Herndon, S. C., Zahniser, M. S., Tucker, S. C., Brewer, W. A.,  
 961 Lerner, B. M., Williams, E. J., Harley, R. A., Fehsenfeld, F. C., Warneke, C., and de Gouw, J. A.:  
 962 Measurements of volatile organic compounds during the 2006 TexAQS/GoMACCS campaign:  
 963 Industrial influences, regional characteristics, and diurnal dependencies of the OH reactivity, *Journal*  
 964 *of Geophysical Research: Atmospheres*, 114, n/a-n/a, 10.1029/2008JD011525, 2009.

965 Goldan, P. D., Kuster, W. C., Williams, E., Murphy, P. C., Fehsenfeld, F. C., and Meagher, J.:  
 966 Nonmethane hydrocarbon and oxy hydrocarbon measurements during the 2002 New England Air  
 967 Quality Study, *J. Geophys. Res.*, 109, D21309, doi:10.1029/2003JD004455, 2004.

968 Gordon, T. D., Presto, A. A., May, A. A., Nguyen, N. T., Lipsky, E. M., Donahue, N. M., Gutierrez, A.,  
 969 Zhang, M., Maddox, C., Rieger, P., Chattopadhyay, S., Maldonado, H., Maricq, M. M., and Robinson,  
 970 A. L.: Secondary organic aerosol formation exceeds primary particulate matter emissions for light-  
 971 duty gasoline vehicles, *Atmos. Chem. Phys.*, 14, 4661-4678, 10.5194/acp-14-4661-2014, 2014a.

972 Gordon, T. D., Presto, A. A., Nguyen, N. T., Robertson, W. H., Na, K., Sahay, K. N., Zhang, M., Maddox,  
 973 C., Rieger, P., Chattopadhyay, S., Maldonado, H., Maricq, M. M., and Robinson, A. L.: Secondary  
 974 organic aerosol production from diesel vehicle exhaust: impact of aftertreatment, fuel chemistry and  
 975 driving cycle, *Atmos. Chem. Phys.*, 14, 4643-4659, 10.5194/acp-14-4643-2014, 2014b.

976 Görner, P., Simon, X., Bémer, D., and Lidén, G.: Workplace aerosol mass concentration measurement  
 977 using optical particle counters, *Journal of Environmental Monitoring*, 14, 420-428, 2012.

978 Harrison, R., and Webb, J.: A review of the effect of N fertilizer type on gaseous emissions, in:  
 979 *Advances in Agronomy*, Academic Press, 65-108, 2001.

980 Heim, M., Kasper, G., Reischl, G. P., and Gerhart, C.: Performance of a New Commercial Electrical  
 981 Mobility Spectrometer, *Aerosol Science and Technology*, 38, 3-14, 10.1080/02786820490519252,  
 982 2004.

983 Helsper, C., Horn, H.-G., Schneider, F., Wehner, B., and Wiedensohler, A.: Intercomparison of five  
 984 mobility size spectrometers for measuring atmospheric submicrometer aerosol particles,  
 985 *Partikelmessstechnik*, 68, 475-481, 2008.

986 Hengst, M.: Flüchtige Organische Verbindungen in der Ausatemluft von Kindern und Jugendlichen mit  
 987 Asthma Bronchiale, PhD, Medizinischen Fakultät, Rheinisch-Westfälischen Technischen Hochschule  
 988 Aachen, Aachen, Deutschland, 2007.

989 Jacob, D. J., and Winner, D. A.: Effect of climate change on air quality, *Atmos. Environ.*, 43, 51-63,  
 990 10.1016/j.atmosenv.2008.09.051, 2009.

991 Kaminski, H.: personal communication, in, edited by: Gerwig, H., 2011.

992 Kaminski, H., Kuhlbusch, T. A. J., Rath, S., Götz, U., Sprenger, M., Wels, D., Polloczek, J., Bachmann, V.,  
 993 Dziurawitz, N., Kiesling, H.-J., Schwiegelshohn, A., Monz, C., Dahmann, D., and Asbach, C.:  
 994 Comparability of mobility particle sizers and diffusion chargers, *Journal of Aerosol Science*, 57, 156-  
 995 178, <http://dx.doi.org/10.1016/j.jaerosci.2012.10.008>, 2013.

996 Karl, T., Striednig, M., Graus, M., Hammerle, A., and Wohlfahrt, G.: Urban flux measurements reveal a  
 997 large pool of oxygenated volatile organic compound emissions, *Proceedings of the National Academy*  
 998 *of Sciences*, 2018.

999 Kofahl, C.: Hochempfindliche Bestimmung der organischen und anorganischen Kohlenstoff-Fraktion  
 1000 in Feinstaubproben mittels CRD-Spektroskopie, BS, Chemie und Biotechnologie, Fachhochschule  
 1001 Aachen, 2012.

Formatted: English (U.S.)

Field Code Changed

Formatted: English (U.S.)

Formatted: English (U.S.)

Kuenen, J. J. P., Visschedijk, A. J. H., Jozwicka, M., and Denier van der Gon, H. A. C.: TNO-MACC-II emission inventory; a multi-year (2003-2009) consistent high-resolution European emission inventory for air quality modelling, *Atmos. Chem. Phys.*, 14, 10963-10976, 10.5194/acp-14-10963-2014, 2014.

Lelieveld, J., Evans, J. S., Fnais, M., Giannadaki, D., and Pozzer, A.: The contribution of outdoor air pollution sources to premature mortality on a global scale, *Nature*, 525, 367-371, 10.1038/nature15371, 2015.

Lerner, B. M., Gilman, J. B., Aikin, K. C., Atlas, E. L., Goldan, P. D., Graus, M., Hendershot, R., Isaacman-VanWertz, G. A., Koss, A., Kuster, W. C., Lueb, R. A., McLaughlin, R. J., Peischl, J., Sueper, D., Ryerson, T. B., Tokarek, T. W., Warneke, C., Yuan, B., and de Gouw, J. A.: An improved, automated whole air sampler and gas chromatography mass spectrometry analysis system for volatile organic compounds in the atmosphere, *Atmos. Meas. Tech.*, 10, 291-313, 10.5194/amt-10-291-2017, 2017.

Lindinger, W., Hirber, J., and Paretzke, H.: An ion/molecule-reaction mass spectrometer used for on-line trace gas analysis, *International Journal of Mass Spectrometry and Ion Processes*, 129, 79-88, [http://dx.doi.org/10.1016/0168-1176\(93\)87031-M](http://dx.doi.org/10.1016/0168-1176(93)87031-M), 1993.

Liu, Y., Shao, M., Lu, S., Chang, C. C., Wang, J. L., and Chen, G.: Volatile Organic Compound (VOC) measurements in the Pearl River Delta (PRD) region, China, *Atmos. Chem. Phys.*, 8, 1531-1545, 10.5194/acp-8-1531-2008, 2008.

Lough, G. C., Christensen, C. G., Schauer, J. J., Tortorelli, J., Mani, E., Lawson, D. R., Clark, N. N., and Gabele, P. A.: Development of molecular marker source profiles for emissions from on-road gasoline and diesel vehicle fleets, *Journal of the Air & Waste Management Association* (1995), 57, 1190-1199, 2007.

Mäki, M., Heinonsalo, J., Hellén, H., and Bäck, J.: Contribution of understorey vegetation and soil processes to boreal forest isoprenoid exchange, *Biogeosciences*, 14, 1055-1073, 10.5194/bg-14-1055-2017, 2017.

Miyazaki, Y., Kawamura, K., Jung, J., Furutani, H., and Uematsu, M.: Latitudinal distributions of organic nitrogen and organic carbon in marine aerosols over the western North Pacific, *Atmos. Chem. Phys.*, 11, 3037-3049, 10.5194/acp-11-3037-2011, 2011.

Mølgaard, B., Birmili, W., Clifford, S., Massling, A., Eleftheriadis, K., Norman, M., Vratolis, S., Wehner, B., Corander, J., Hämeri, K., and Hussein, T.: Evaluation of a statistical forecast model for size-fractionated urban particle number concentrations using data from five European cities, *Journal of Aerosol Science*, 66, 96-110, <http://dx.doi.org/10.1016/j.jaerosci.2013.08.012>, 2013.

Munkel, C.: Mixing height determination with lidar ceilometers results from Helsinki Testbed, *Meteorologische Zeitschrift*, 16, 451-459, 10.1127/0941-2948/2007/0221, 2007.

Munkel, C., Schäfer, K., and Emeis, S.: Adding confidence levels and error bars to mixing layer heights detected by ceilometer, 2011, 817708-817708-817709.

Park, S. S., Kim, Y. J., and Kang, C. H.: Atmospheric polycyclic aromatic hydrocarbons in Seoul, Korea, *Atmos. Environ.*, 36, 2917-2924, [http://dx.doi.org/10.1016/S1352-2310\(02\)00206-6](http://dx.doi.org/10.1016/S1352-2310(02)00206-6), 2002.

Putaud, J.-P., Raes, F., Van Dingenen, R., Brüggemann, E., Facchini, M. C., Decesari, S., Fuzzi, S., Gehrig, R., Hüglin, C., Laj, P., Lorbeer, G., Maenhaut, W., Mihalopoulos, N., Müller, K., Querol, X., Rodriguez, S., Schneider, J., Spindler, G., Brink, H. t., Tørseth, K., and Wiedensohler, A.: A European aerosol phenomenology—2: chemical characteristics of particulate matter at kerbside, urban, rural and background sites in Europe, *Atmos. Environ.*, 38, 2579-2595, <http://dx.doi.org/10.1016/j.atmosenv.2004.01.041>, 2004.

Putaud, J. P., Van Dingenen, R., Alastuey, A., Bauer, H., Birmili, W., Cyrys, J., Flentje, H., Fuzzi, S., Gehrig, R., Hansson, H. C., Harrison, R. M., Herrmann, H., Hitztenberger, R., Hüglin, C., Jones, A. M., Kasper-Giebl, A., Kiss, G., Kousa, A., Kuhlbusch, T. A. J., Löschau, G., Maenhaut, W., Molnar, A., Moreno, T., Pekkanen, J., Perrino, C., Pitz, M., Puxbaum, H., Querol, X., Rodriguez, S., Salma, I.,

Formatted: English (U.S.)

Formatted: English (U.S.)

Field Code Changed

Formatted: English (U.S.)

Field Code Changed

Formatted: English (U.S.)

Formatted: English (U.S.)

Field Code Changed

Formatted: English (U.S.)

Formatted: English (U.S.)

Field Code Changed

Formatted: English (U.S.)

Formatted: English (U.S.)

1049 Schwarz, J., Smolik, J., Schneider, J., Spindler, G., ten Brink, H., Tursic, J., Viana, M., Wiedensohler, A.,  
 1050 and Raes, F.: A European aerosol phenomenology – 3: Physical and chemical characteristics of  
 1051 particulate matter from 60 rural, urban, and kerbside sites across Europe, *Atmos. Environ.*, 44, 1308-  
 1052 1320, <http://dx.doi.org/10.1016/j.atmosenv.2009.12.011>, 2010.

1053 Rasmussen, D. J., Hu, J. L., Mahmud, A., and Kleeman, M. J.: The Ozone-Climate Penalty: Past,  
 1054 Present, and Future, *Environmental Science & Technology*, 47, 14258-14266, 10.1021/es403446m,  
 1055 2013.

1056 Ravindra, K., Bencs, L., Wauters, E., de Hoog, J., Deutsch, F., Roekens, E., Bleux, N., Berghmans, P.,  
 1057 and Van Grieken, R.: Seasonal and site-specific variation in vapour and aerosol phase PAHs over  
 1058 Flanders (Belgium) and their relation with anthropogenic activities, *Atmos. Environ.*, 40, 771-785,  
 1059 <http://dx.doi.org/10.1016/j.atmosenv.2005.10.011>, 2006.

1060 Ravindra, K., Sokhi, R., and Van Grieken, R.: Atmospheric polycyclic aromatic hydrocarbons: Source  
 1061 attribution, emission factors and regulation, *Atmos. Environ.*, 42, 2895-2921,  
 1062 <http://dx.doi.org/10.1016/j.atmosenv.2007.12.010>, 2008.

1063 Reimann, S., Calanca, P., and Hofer, P.: The anthropogenic contribution to isoprene concentrations in  
 1064 a rural atmosphere, *Atmos. Environ.*, 34, 109-115, [https://doi.org/10.1016/S1352-2310\(99\)00285-X](https://doi.org/10.1016/S1352-2310(99)00285-X),  
 1065 2000.

1066 Rogge, W. F., Hildemann, L. M., Mazurek, M. A., Cass, G. R., and Simoneit, B. R. T.: Sources of fine  
 1067 organic aerosol. 4. Particulate abrasion products from leaf surfaces of urban plants, *Environmental  
 1068 Science & Technology*, 27, 2700-2711, 10.1021/es00049a008, 1993.

1069 Rushdi, A. I., Al-Zarban, S., and Simoneit, B. R.: Chemical compositions and sources of organic matter  
 1070 in fine particles of soils and sands from the vicinity of Kuwait city, *Environ Monit Assess*, 120, 537-  
 1071 557, 10.1007/s10661-005-9102-8, 2006.

1072 Sannigrahi, P., Sullivan, A. P., Weber, R. J., and Ingall, E. D.: Characterization of Water-Soluble Organic  
 1073 Carbon in Urban Atmospheric Aerosols Using Solid-State <sup>13</sup>C NMR Spectroscopy, *Environmental  
 1074 Science & Technology*, 40, 666-672, 10.1021/es051150i, 2006.

1075 Schäfer, K., Blumenstock, T., Bonn, B., Gerwig, H., Hase, F., Munkel, C., Nothard, R., and  
 1076 Schneidemesser, E. v.: Mixing layer height measurements determines influence of meteorology on  
 1077 air pollutant concentrations in urban area, in: *Remote Sensing of Clouds and the Atmosphere XX*,  
 1078 edited by: Comerón, A., Kassianov, E. I., and Schäfer, K., *Proceedings of SPIE*, Bellingham, WA, USA,  
 1079 2015.

1080 Schäfer, K., Elsasser, M., Arteaga-Salas, J. M., Gu, J. W., Pitz, M., Schnelle-Kreis, J., Cyrus, J., Emeis, S.,  
 1081 Prévôt, A. S. H., and Zimmermann, R.: Impact of meteorological conditions on airborne fine particle  
 1082 composition and secondary pollutant characteristics in urban area during winter-time,  
 1083 *Meteorologische Zeitschrift*, 25, 267-279, 2016.

1084 Schauer, J. J., Rogge, W. F., Hildemann, L. M., Mazurek, M. A., Cass, G. R., and Simoneit, B. R. T.:  
 1085 Source apportionment of airborne particulate matter using organic compounds as tracers, *Atmos.  
 1086 Environ.*, 30, 3837-3855, [http://dx.doi.org/10.1016/1352-2310\(96\)00085-4](http://dx.doi.org/10.1016/1352-2310(96)00085-4), 1996.

1087 Senatsverwaltung für Stadtentwicklung III F, B.: Informationssystem Stadt und Umwelt,  
 1088 Flächennutzung und Stadtstruktur, Dokumentation der Kartiereinheiten und Aktualisierung des  
 1089 Datenbestandes, Berlin Senatsverwaltung für Stadtentwicklung, Berlin, 2010.

1090 Shen, R., Schäfer, K., Schnelle-Kreis, J., Shao, L., Norra, S., Kramar, U., Michalke, B., Abbaszade, G.,  
 1091 Streibel, T., Fricker, M., Chen, Y., Zimmermann, R., Emeis, S., and Schmid, H. P.: Characteristics and  
 1092 sources of PM in seasonal perspective – A case study from one year continuously sampling in Beijing,  
 1093 *Atmospheric Pollution Research*, 7, 235-248, <http://dx.doi.org/10.1016/j.apr.2015.09.008>, 2016.

Formatted: English (U.S.)

Formatted: English (U.S.)

Field Code Changed

Field Code Changed

Formatted: English (U.S.)

Formatted: English (U.S.)

Formatted: English (U.S.)

Formatted: English (U.S.)

Field Code Changed

Field Code Changed

Formatted: English (U.S.)

Formatted: English (U.S.)

Formatted: English (U.S.)

Field Code Changed

Formatted: English (U.S.)

Formatted: English (U.S.)

1094 Simoneit, B. R. T.: Organic matter of the troposphere—III. Characterization and sources of petroleum  
 1095 and pyrogenic residues in aerosols over the western united states, *Atmospheric Environment* (1967),  
 1096 18, 51-67, [http://dx.doi.org/10.1016/0004-6981\(84\)90228-2](http://dx.doi.org/10.1016/0004-6981(84)90228-2), 1984.

1097 Simoneit, B. R. T.: Characterization of Organic Constituents in Aerosols in Relation to Their rigin and  
 1098 Transport: A Review, *International Journal of Environmental Analytical Chemistry*, 23, 207-237,  
 1099 10.1080/03067318608076446, 1986.

1100 Simoneit, B. R. T., Schauer, J. J., Nolte, C. G., Oros, D. R., Elias, V. O., Fraser, M. P., Rogge, W. F., and  
 1101 Cass, G. R.: Levoglucosan, a tracer for cellulose in biomass burning and atmospheric particles, *Atmos.*  
 1102 *Environ.*, 33, 173-182, [http://dx.doi.org/10.1016/S1352-2310\(98\)00145-9](http://dx.doi.org/10.1016/S1352-2310(98)00145-9), 1999.

1103 Simoneit, B. R. T.: Biomass burning — a review of organic tracers for smoke from incomplete  
 1104 combustion, *Applied Geochemistry*, 17, 129-162, [http://dx.doi.org/10.1016/S0883-2927\(01\)00061-0](http://dx.doi.org/10.1016/S0883-2927(01)00061-0),  
 1105 2002.

1106 Stein, A. F., Draxler, R. R., Rolph, G. D., Stunder, B. J. B., Cohen, M. D., and Ngan, F.: NOAA's HYSPLIT  
 1107 Atmospheric Transport and Dispersion Modeling System, *Bulletin of the American Meteorological*  
 1108 *Society*, 96, 2059-2077, 10.1175/bams-d-14-00110.1, 2015.

1109 Stülpnagel, A. v., Kaupp, H., Nothard, R., Preuß, J., Preuß, M., Clemen, S., and Grunow, K.:  
 1110 Luftgütemessdaten 2014, Senatsverwaltung für Stadtentwicklung und Umwelt, Berlin, 2015.

1111 Tang, G., Zhang, J., Zhu, X., Song, T., Münkkel, C., Hu, B., Schäfer, K., Liu, Z., Zhang, J., Wang, L., Xin, J.,  
 1112 Suppan, P., and Wang, Y.: Mixing layer height and its implications for air pollution over Beijing, China,  
 1113 *Atmos. Chem. Phys.*, 16, 2459-2475, 10.5194/acp-16-2459-2016, 2016.

1114 Thijssse, T. R., van Oss, R. F., and Lenschow, P.: Determination of Source Contributions to Ambient  
 1115 Volatile Organic Compound Concentrations in Berlin, *Journal of the Air & Waste Management*  
 1116 *Association*, 49, 1394-1404, 10.1080/10473289.1999.10463974, 1999.

1117 Urban, S.: Charakterisierung der Quellverteilung von Feinstaub und Stickoxiden in ländlichem und  
 1118 städtischem Gebiet, PhD, Mathematik und Naturwissenschaften, Bergischen Universität Wuppertal,  
 1119 Wuppertal, Germany, 2010.

1120 VDI: VDI Richlinie 3871: Messen von Partikeln in der Außenluft - Elektrische Aerosolmonitore auf  
 1121 Basis der Diffusionsaufladung, in, edited by: Ingenieure, V. D., 2017.

1122 Villalobos, A. M., Barraza, F., Jorquera, H., and Schauer, J. J.: Chemical speciation and source  
 1123 apportionment of fine particulate matter in Santiago, Chile, 2013, *Science of The Total Environment*,  
 1124 512-513, 133-142, <http://dx.doi.org/10.1016/j.scitotenv.2015.01.006>, 2015.

1125 Volz-Thomas, A., Geiss, H., Hofzumahaus, A., and Becker, K. H.: Introduction to special section:  
 1126 Photochemistry experiment in BERLIOZ, *Journal of Geophysical Research D: Atmospheres*, 108, 1-1,  
 1127 2003.

1128 von Schneidemesser, E., Monks, P. S., and Plass-Duelmer, C.: Global comparison of VOC and CO  
 1129 observations in urban areas, *Atmos. Environ.*, 44, 5053-5064,  
 1130 <https://doi.org/10.1016/j.atmosenv.2010.09.010>, 2010.

1131 von Schneidemesser, E., Monks, P. S., Gros, V., Gauduin, J., and Sanchez, O.: How important is  
 1132 biogenic isoprene in an urban environment? A study in London and Paris, *Geophysical Research*  
 1133 *Letters*, 38, 10.1029/2011GL048647, 2011.

1134 Wang, Y., Zhuang, G., Tang, A., Yuan, H., Sun, Y., Chen, S., and Zheng, A.: The ion chemistry and the  
 1135 source of PM2.5 aerosol in Beijing, *Atmos. Environ.*, 39, 3771-3784,  
 1136 <http://dx.doi.org/10.1016/j.atmosenv.2005.03.013>, 2005.

1137 Watson, J. G., Cooper, J. A., and Huntzicker, J. J.: The effective variance weighting for least squares  
 1138 calculations applied to the mass balance receptor model, *Atmospheric Environment* (1967), 18, 1347-  
 1139 1355, [http://dx.doi.org/10.1016/0004-6981\(84\)90043-X](http://dx.doi.org/10.1016/0004-6981(84)90043-X), 1984.

Formatted: English (U.S.)

Formatted: English (U.S.)

Field Code Changed

Field Code Changed

Formatted: English (U.S.)

Formatted: English (U.S.)

Formatted: English (U.S.)

Formatted: English (U.S.)

Field Code Changed

Formatted: English (U.S.)

Formatted: English (U.S.)

Field Code Changed

Formatted: English (U.S.)

Formatted: English (U.S.)

Formatted: English (U.S.)

Formatted: English (U.S.)

Field Code Changed

Field Code Changed

Formatted: English (U.S.)

Formatted: English (U.S.)

Field Code Changed

Formatted: English (U.S.)

Formatted: English (U.S.)

1140 Weinhold, K.: personal communication, in, edited by: Gerwig, H., 2014.

1141 West, J. J., Smith, S. J., Silva, R. A., Naik, V., Zhang, Y., Adelman, Z., Fry, M. M., Anenberg, S., Horowitz,

1142 L. W., and Lamarque, J.-F.: Co-benefits of mitigating global greenhouse gas emissions for future air

1143 quality and human health, *Nature Clim. Change*, 3, 885-889, 10.1038/nclimate2009

1144 <http://www.nature.com/nclimate/journal/v3/n10/abs/nclimate2009.html#supplementary->

1145 [information](http://www.nature.com/nclimate/journal/v3/n10/abs/nclimate2009.html#supplementary-information), 2013.

1146 Whalley, L. K., Stone, D., Bandy, B., Dunmore, R., Hamilton, J. F., Hopkins, J., Lee, J. D., Lewis, A. C.,

1147 and Heard, D. E.: Atmospheric OH reactivity in central London: observations, model predictions and

1148 estimates of in situ ozone production, *Atmos. Chem. Phys.*, 16, 2109-2122, 10.5194/acp-16-2109-

1149 2016, 2016.

1150 WHO: WHO releases country estimates on air pollution exposure and health impact, in, World Health

1151 Organization, Geneva, 2016.

1152 Wiedensohler, A., Wiesner, A., Weinhold, K., Birmili, W., Hermann, M., Merkel, M., Müller, T., Pfeifer,

1153 S., Schmidt, A., Tuch, T., Velarde, F., Quincey, P., Seeger, S., and Nowak, A.: Mobility Particle Size

1154 Spectrometers: Calibration Procedures and Measurement Uncertainties, *Aerosol Science and*

1155 *Technology*, 10.1080/02786826.2017.1387229, 2017.

1156 Wiegner, M., Madonna, F., Binietoglou, I., Forkel, R., Gasteiger, J., Geiß, A., Pappalardo, G., Schäfer,

1157 K., and Thomas, W.: What is the benefit of ceilometers for aerosol remote sensing? An answer from

1158 EARLINET, *Atmospheric Measurement Techniques*, 7, 1979-1997, 10.5194/amt-7-1979-2014, 2014.

1159 Wiegner, M., and Gasteiger, J.: Correction of water vapor absorption for aerosol remote sensing with

1160 ceilometers, *Atmos. Meas. Tech.*, 8, 3971-3984, 10.5194/amt-8-3971-2015, 2015.

1161 Winkler, J., Blank, P., Glaser, K., Gomes, J. A. G., Habram, M., Jambert, C., Jaeschke, W., Konrad, S.,

1162 Kurtenbach, R., Lenschow, P., Lörzer, J. C., Perros, P. E., Pesch, M., Prümke, H. J., Rappenglück, B.,

1163 Schmitz, T., Slemr, F., Volz-Thomas, A., and Wickert, B.: Ground-Based and Airborne Measurements

1164 of Nonmethane Hydrocarbons in BERLIOZ: Analysis and Selected Results, *Journal of Atmospheric*

1165 *Chemistry*, 42, 465-492, 10.1023/a:1015709214016, 2002.

1166 WorldBank: The Cost of Air Pollution : Strengthening the Economic Case for Action, World Bank,

1167 Washington, DC, 2016.

1168 Yang, H., Li, Q., and Yu, J. Z.: Comparison of two methods for the determination of water-soluble

1169 organic carbon in atmospheric particles, *Atmos. Environ.*, 37, 865-870,

1170 [http://dx.doi.org/10.1016/S1352-2310\(02\)00953-6](http://dx.doi.org/10.1016/S1352-2310(02)00953-6), 2003.

1171 Zhang, T., Claeys, M., Cachier, H., Dong, S., Wang, W., Maenhaut, W., and Liu, X.: Identification and

1172 estimation of the biomass burning contribution to Beijing aerosol using levoglucosan as a molecular

1173 marker, *Atmos. Environ.*, 42, 7013-7021, <http://dx.doi.org/10.1016/j.atmosenv.2008.04.050>, 2008.

1174

1175

Formatted: English (U.S.)

Field Code Changed

Formatted: English (U.S.)

Field Code Changed

Formatted: English (U.S.)

Formatted: English (U.S.)

Formatted: English (U.S.)

Formatted: English (U.S.)

Field Code Changed

### Figure Captions:

**Figure 1.** Location of the measurement station (MC042) and measurement van in Neukölln, Berlin. Maps show increasingly larger scale. The 'x's indicate sampling locations, with MC220 and MC143 indicating stations that record traffic counts. Map images from OpenStreetMap.

**Figure 2.** Time series of air pollutant concentrations, meteorological data, and benzene/toluene ratio measured as part of BLUME at the Neukölln station during the BAERLIN2014 campaign.

**Figure 3.** Time series of particulate matter mass, particle number, and lung depositable surface area concentrations measured at the Neukölln station during the BAERLIN2014 campaign. (a) BLUME PM10, (b) Grimm 1.108 PM10, (c) Grimm 1.108 PM2.5, (d) Grimm 1.108 PM1, (e) Grimm 1.108 PN, (f) Grimm 5.416 PN, (g) Grimm 5.403 PN, (h) NSAM LDSA. Units given in the y-axis label.

**Figure 4.** Mean diurnal cycles of the (top) particle number and (bottom) particle volume distributions at Neukölln. Legends show particle size bin range in nm.

**Figure 5.** Mean diurnal cycle of the particle number concentration by diameter.

**Figure 6.** Mean fractional contribution to mixing ratio (left column) and OH reactivity (right column) by compound class, based on a total mixing ratio or OH reactivity calculated from 57 compounds for 5 sampling locations throughout the city. Total number of canister samples for each location are Neukölln (18), Altlandsberg (10), Plänterwald (11), Tiergarten Tunnel (9), and the AVUS (2). The individual compounds included in each class are available in the SI.

**Figure 7.** Comparison between VOC measurements in this study and comparable previous work from June-August of 1996 (Thijssse et al., 1999). Compound classes are distinguished by color. Sampling locations by character.

Field Code Changed

**Figure 8.** Bulk composition analysis results from the PM10 filter samples, presented by filter groups, where GRA=Group A, GRB=Group B, etc. and B17, B19, B30 are individual filters. More information on the filter groups, including a some basic composition information and backtrajectory origin can be found in Table 3.

**Figure 9.** Molecular marker analysis results from the PM10 filter samples, presented by filter groups, where GRA=Group A, GRB=Group B, etc. and B17, B19, B30 are individual filters. More information on the filter groups, including a some basic composition information and backtrajectory origin can be found in Table 3.

**Figure 10.** Source contributions attributed to the OC fraction of the PM10 filter samples by filter groups, where GRA=Group A, GRB=Group B, etc. and B17, B19, B30 are individual filters. More information on the filter groups, including a some basic composition information and backtrajectory origin can be found in Table 3.



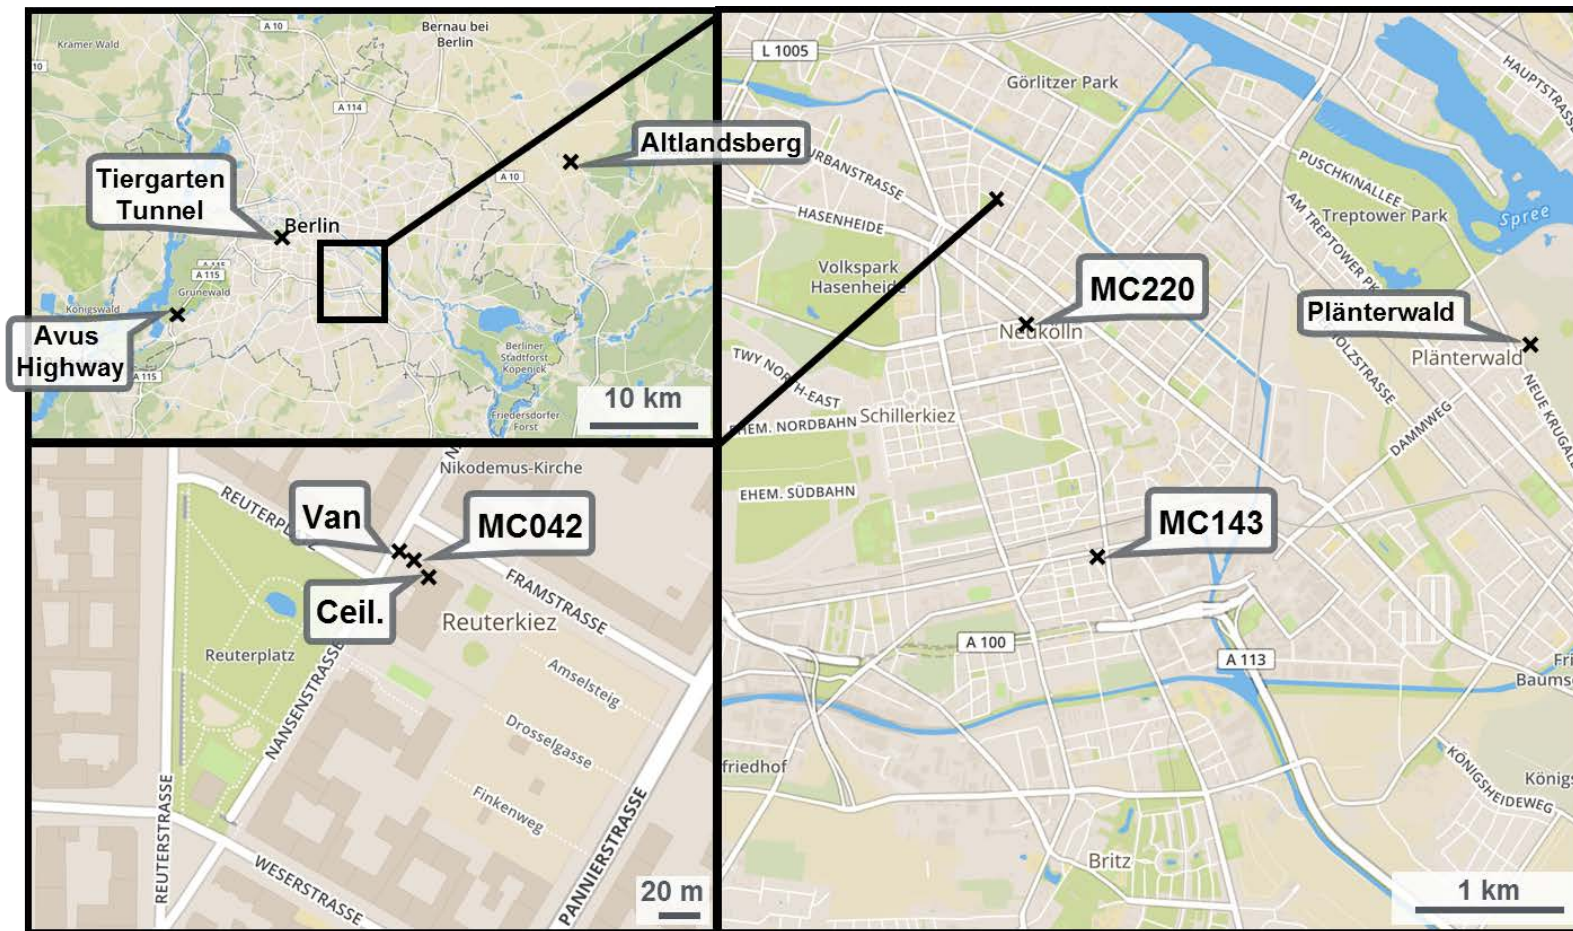

**Figure 1.** Location of the measurement station (MC042) and measurement van in Neukölln, Berlin. Maps show increasingly larger scale. The 'x's indicate sampling locations, with MC220 and MC143 indicating stations that record traffic counts. Map images from OpenStreetMap.

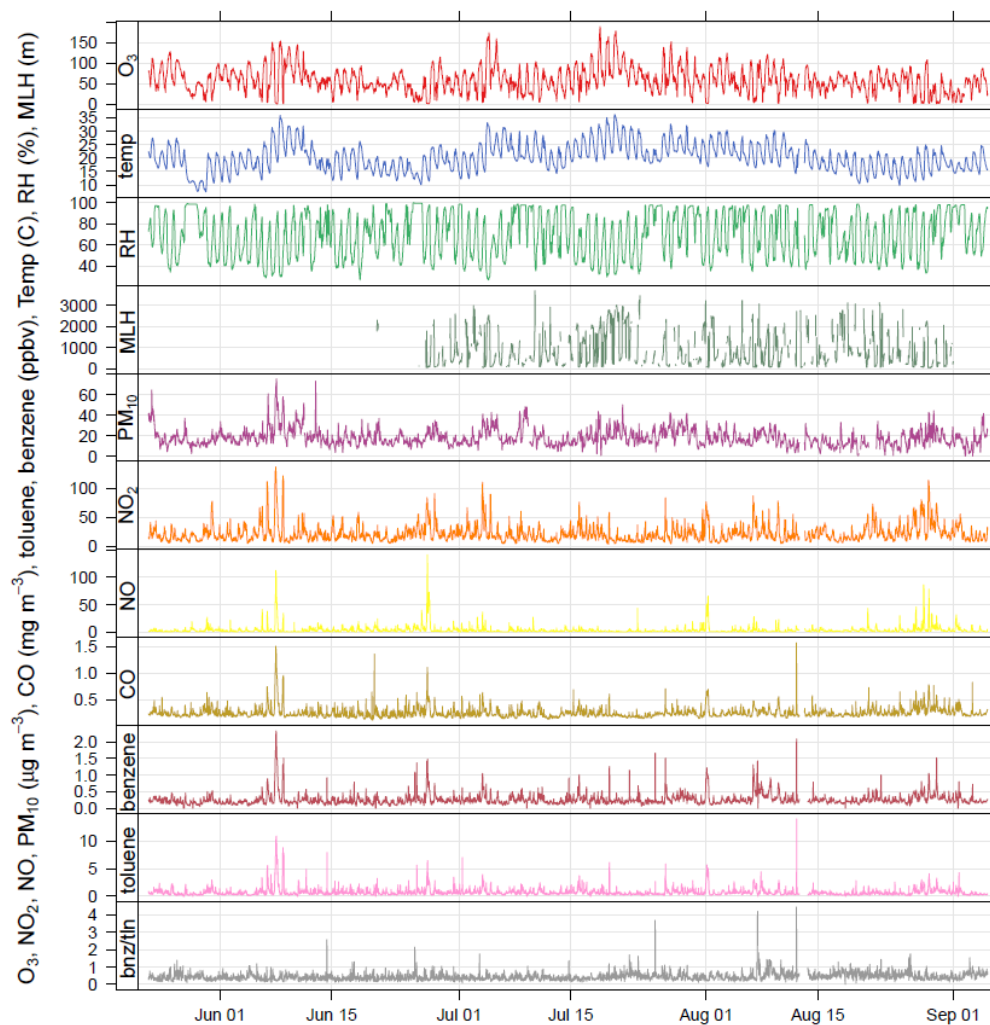

**Figure 2.** Time series of air pollutant concentrations, meteorological data, and benzene/toluene ratio measured as part of BLUME at the Neukölln station during the BAERLIN2014 campaign.



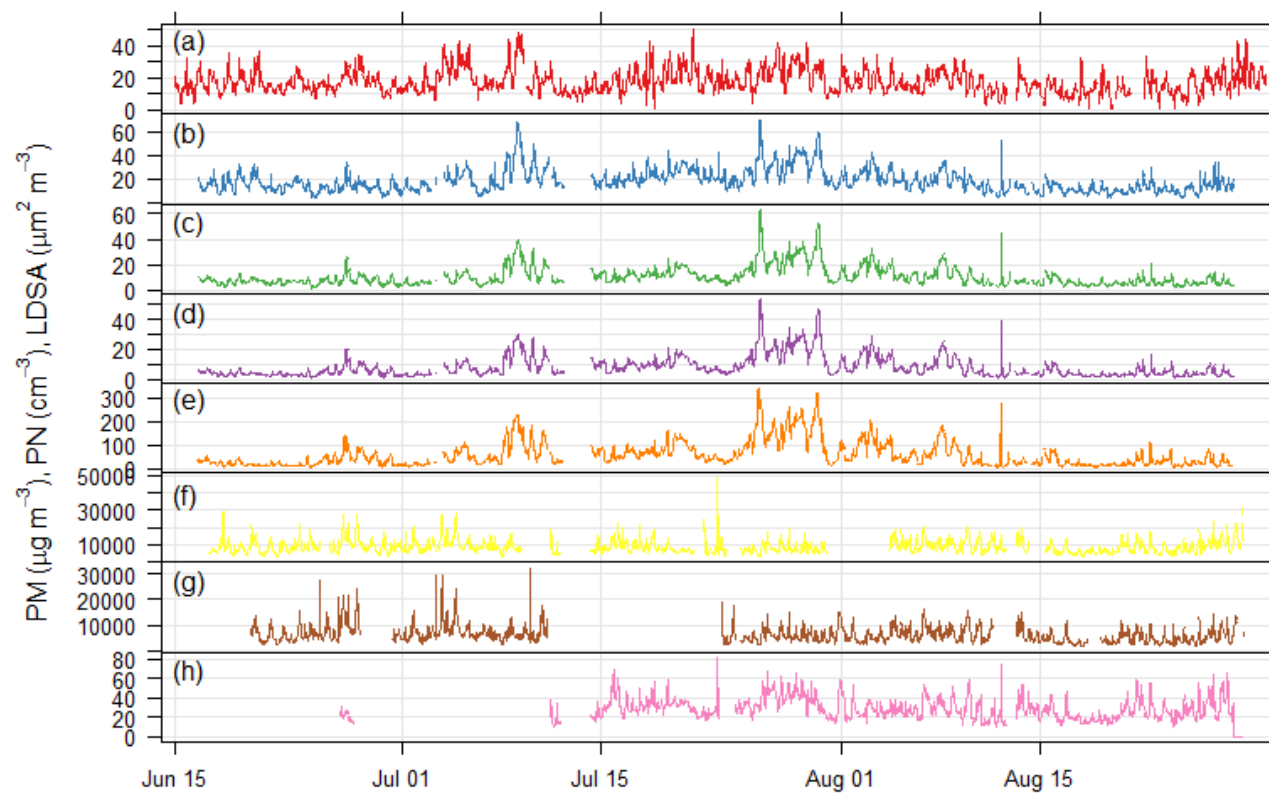

**Figure 3.** Time series of particulate matter mass, particle number, and lung depositable surface area concentrations measured at the Neukölln station during the BAERLIN2014 campaign. (a) BLUME PM10, (b) Grimm 1.108 PM10, (c) Grimm 1.108 PM2.5, (d) Grimm 1.108 PM1, (e) Grimm 1.108 PN, (f) Grimm 5.416 PN, (g) Grimm 5.403 PN, (h) NSAM LDSA. Units given in the y-axis label.

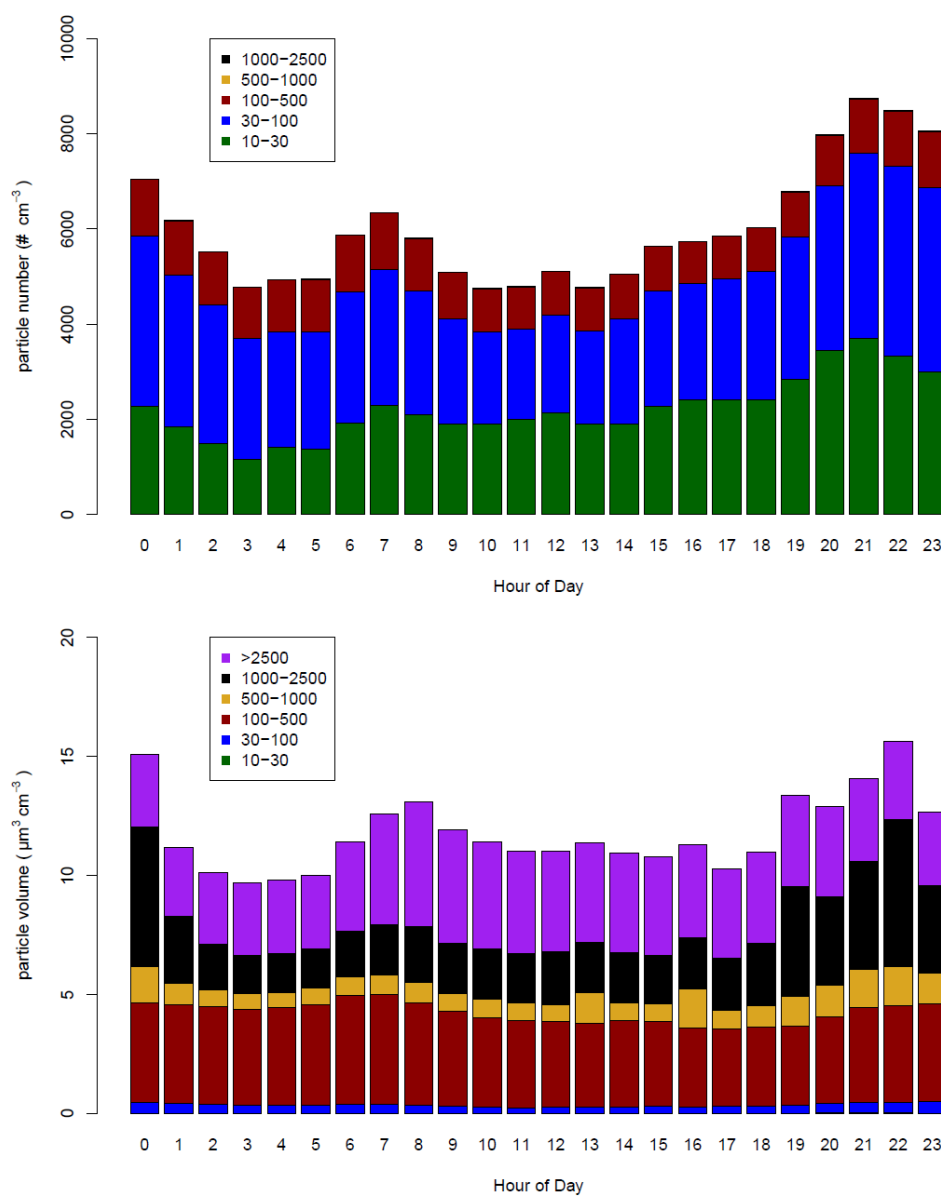

**Figure 4.** Mean diurnal cycles of the (top) particle number and (bottom) particle volume distributions at Neukölln. Legends show particle size bin range in nm.

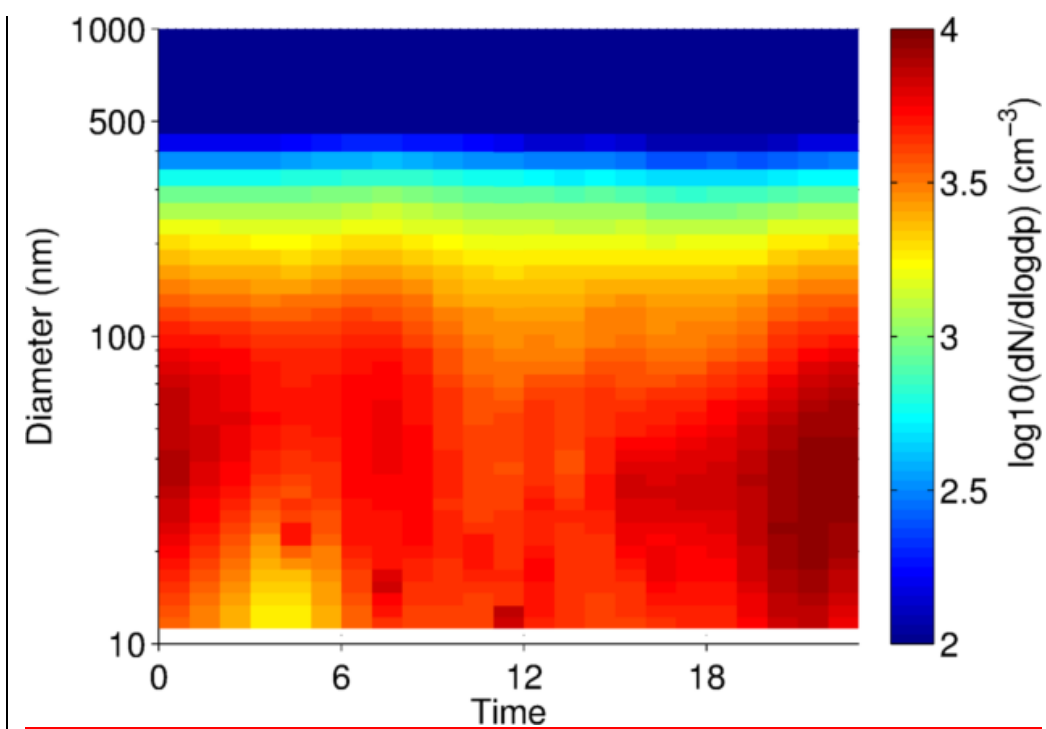

**Figure 5.** Mean diurnal cycle of the particle number concentration by diameter.

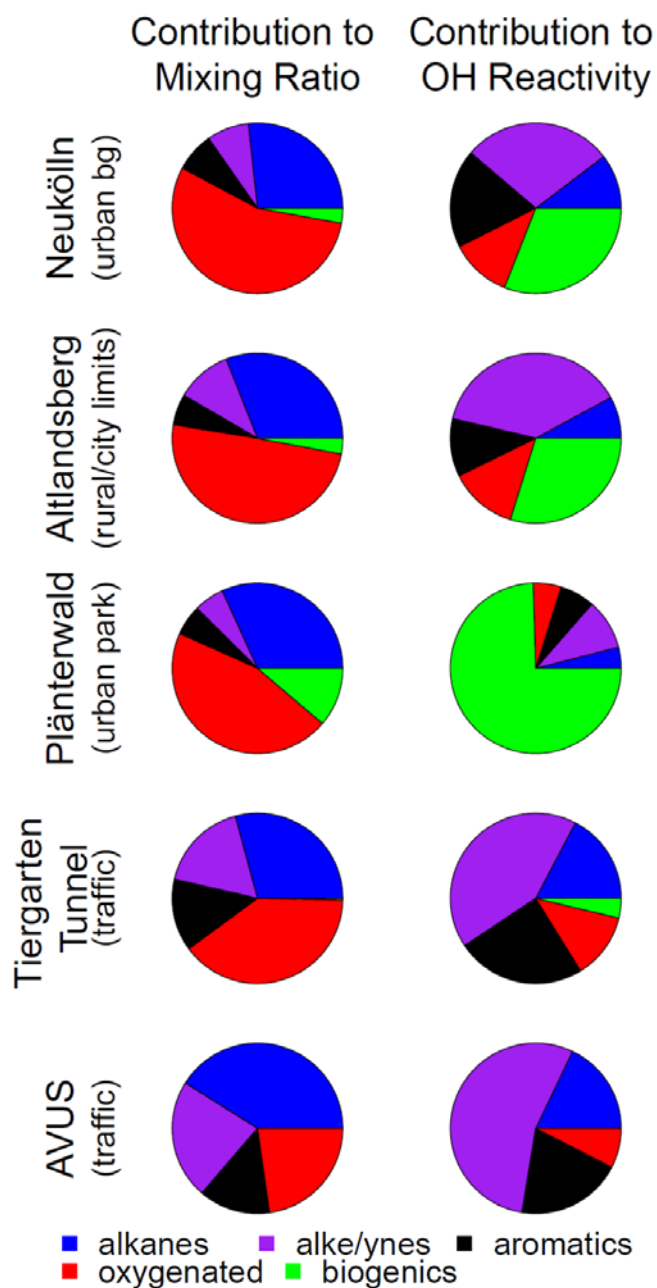

**Figure 6.** Mean fractional contribution to mixing ratio (left column) and OH reactivity (right column) by compound class, based on a total mixing ratio or OH reactivity calculated from 57 compounds for 5 sampling locations throughout the city. Total number of canister samples for each location are Neukölln (18), Altlandsberg (10), Plänterwald (11), Tiergarten Tunnel (9), and the AVUS (2). The individual compounds included in each class are available in the SI. [For more information on the site classification, see Table 2.](#)

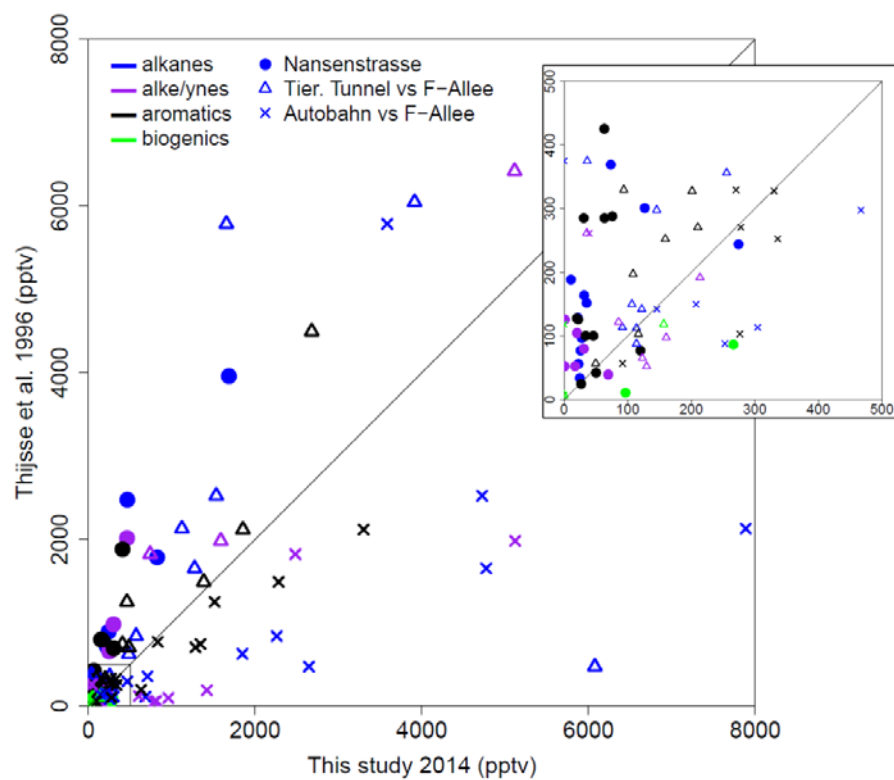

**Figure 7.** Comparison between VOC measurements in this study and comparable previous work from June-August of 1996 (Thijssse et al., 1999). Compound classes are distinguished by color. Sampling locations by character.

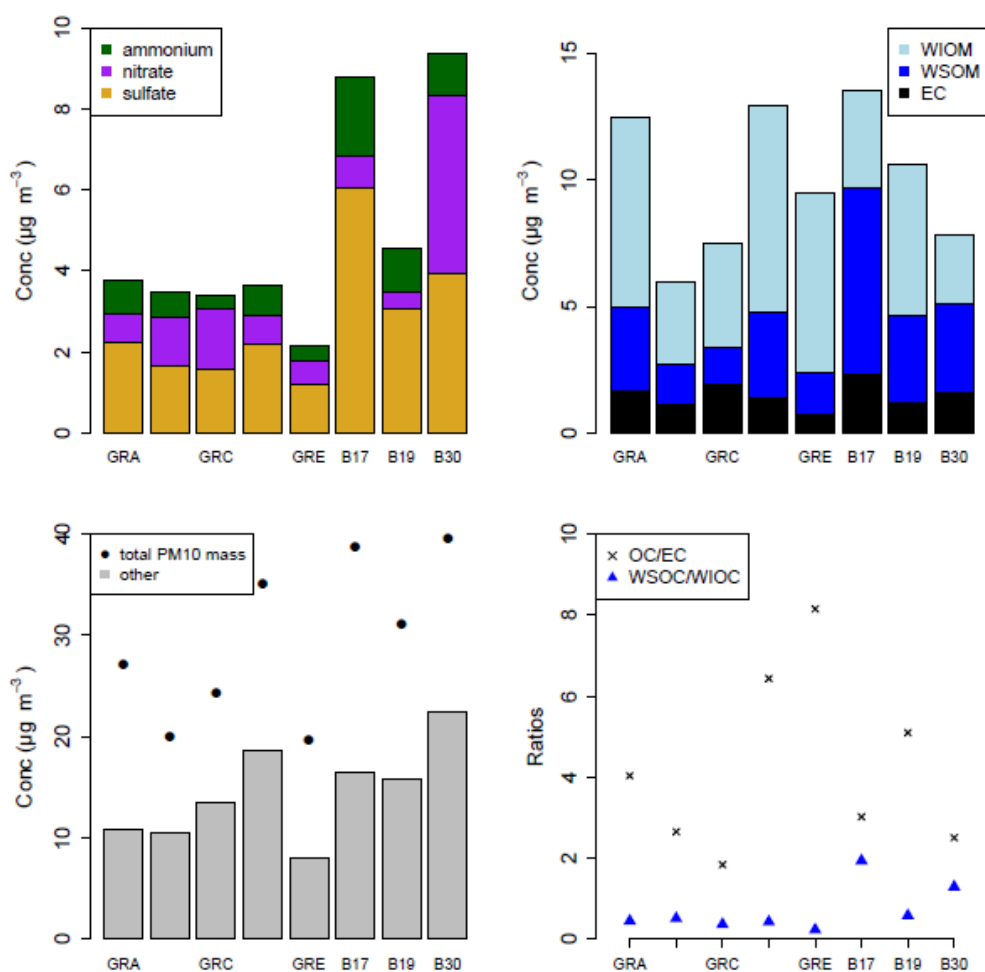

**Figure 8.** Bulk composition analysis results from the PM10 filter samples, presented by filter groups, where GRA=Group A, GRB=Group B, etc. and B17, B19, B30 are individual filters. More information on the filter groups, including a some basic composition information and backtrajectory origin can be found in Table 3.

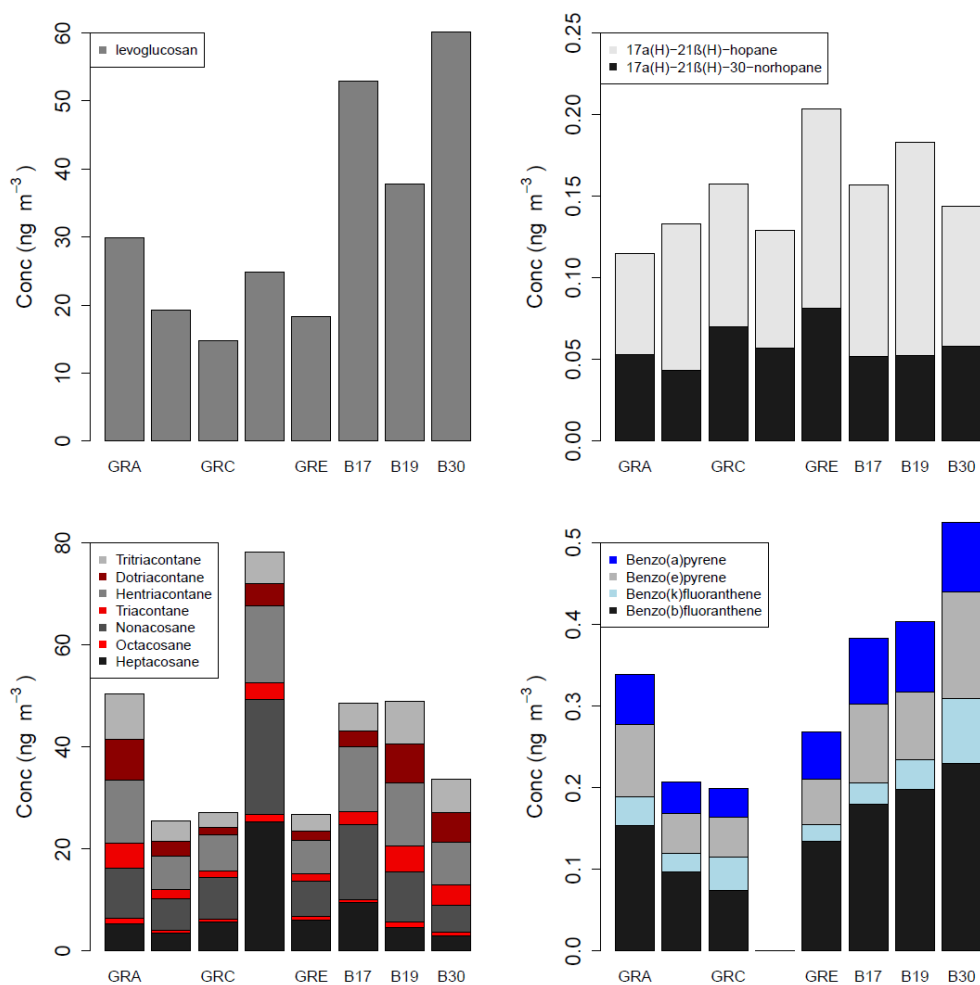

**Figure 9.** Molecular marker analysis results from the PM10 filter samples, presented by filter groups, where GRA=Group A, GRB=Group B, etc. and B17, B19, B30 are individual filters. More information on the filter groups, including a some basic composition information and backtrajectory origin can be found in Table 3.

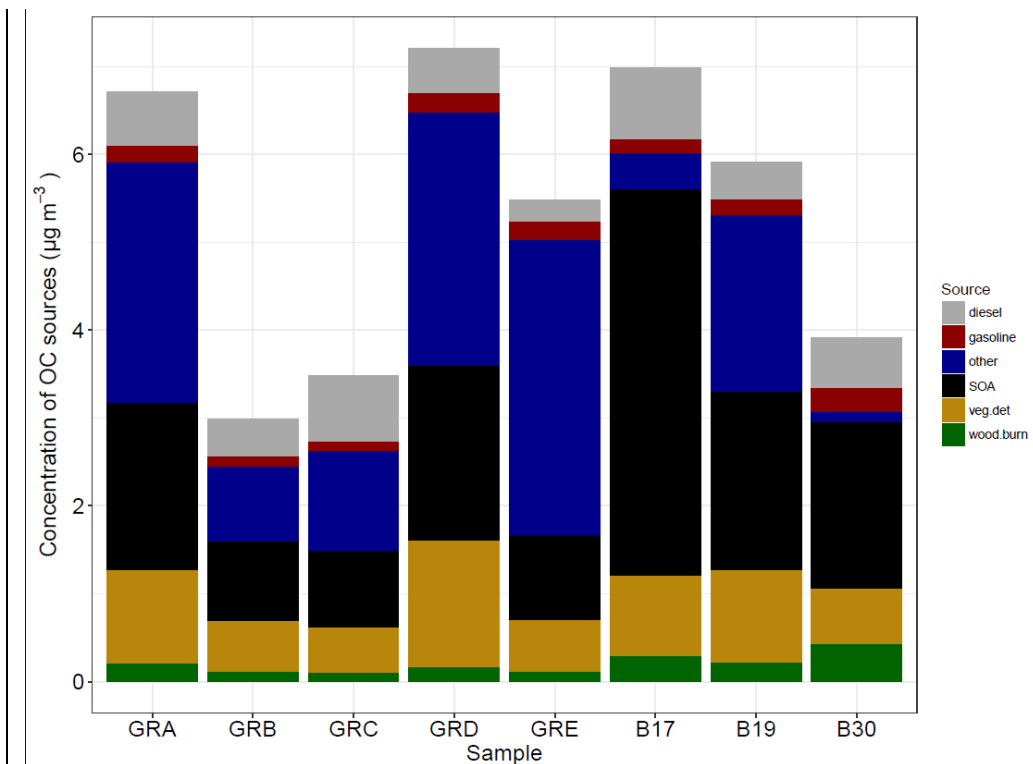

**Figure 10.** Source contributions attributed to the OC fraction of the PM10 filter samples by filter groups, where GRA=Group A, GRB=Group B, etc. and B17, B19, B30 are individual filters. More information on the filter groups, including a some basic composition information and backtrajectory origin can be found in Table 3.



**Table 1.** List of participating institutions and instruments deployed at the urban background site in Berlin (Nansenstrasse).

| Institution   | Instrument                            | Parameters                                                                                                                   | References                                                                           |
|---------------|---------------------------------------|------------------------------------------------------------------------------------------------------------------------------|--------------------------------------------------------------------------------------|
| Berlin Senate | Leckel GmbH SEQ47/50 (x1)             | PM <sub>10</sub>                                                                                                             | DIN EN 16450:2015-10; Beuth, 2015                                                    |
|               | Horiba APNA-370 Air Pollution Monitor | NO <sub>x</sub> , NO (measured directly); NO <sub>2</sub> (inferred)                                                         | DIN EN 14211:2005; Verbraucherschutz, 2010                                           |
|               | Horiba APOA-370 Air Pollution Monitor | O <sub>3</sub>                                                                                                               | DIN EN 14625:2005; Verbraucherschutz, 2010                                           |
|               | Horiba APMA-370 Air Pollution Monitor | CO                                                                                                                           | DIN EN 14626:2005; Verbraucherschutz, 2010                                           |
|               | AMA Instruments GC5000 BTX            | Benzene, toluene                                                                                                             | DIN EN 14662:2005; Verbraucherschutz, 2010                                           |
| KIT           | Vaisala CL51 Ceilometer               | Mixing layer height                                                                                                          | Emeis et al., 2007; Münkler et al., 2007; Wiegner et al., 2014                       |
| UBA           | GRIMM 1.108                           | Particle number and size distribution (350-22500 nm), 15 size bins                                                           | Görner et al. 2012                                                                   |
|               | GRIMM 5.403                           | Particle number and size distribution (10-1100 nm), 44 size bins                                                             | Heim et al., 2004                                                                    |
|               | GRIMM 5.416                           | Total particle number (4-3000 nm)                                                                                            | Helsper et al., 2008; Wiedensohler et al., 2017                                      |
|               | NSAM                                  | Particle surface area (10-1000 nm)                                                                                           | Kaminski et al., 2013; VDI 2017                                                      |
| IASS          | PTR-MS                                | NMVOCs (for a complete list of m/z see Table S1)                                                                             | Bourtsoukidis et al. 2014                                                            |
| FZJ           | Canister samples                      | NMVOCs (for a list of compounds, see Table 8 in Bonn et al., 2016, or for the 57 compounds included in this analysis the SI) | Urban 2010; Ehlers et al. 2016                                                       |
|               | Filter sampling/analysis              | PM <sub>10</sub> , mass, EC, OC                                                                                              | Kofahl 2012; Ehlers 2013                                                             |
| FMI-Helsinki  | Cartridge samples                     | Biogenic NMVOCs                                                                                                              | Mäki et al. 2017                                                                     |
| UW-Madison    | Filter analysis                       | WSOC, WIOC, ions, organic tracers                                                                                            | Yang et al., 2003; Wang et al., 2005; Miyazaki et al., 2011; Villalobos et al., 2015 |

Formatted: Subscript

**Table 2.** NMVOC canister sampling locations, site type, and average OH reactivity ( $\text{s}^{-1}$ )

|                    | Location type                                                                                  | alkanes         | alkenes         | aromatics       | oxygenated      | biogenics       | total          |
|--------------------|------------------------------------------------------------------------------------------------|-----------------|-----------------|-----------------|-----------------|-----------------|----------------|
| Neukölln†          | Urban background station                                                                       | $0.27 \pm 0.10$ | $0.75 \pm 0.40$ | $0.49 \pm 0.29$ | $0.29 \pm 0.08$ | $0.82 \pm 0.44$ | $2.6 \pm 0.68$ |
| Altlandsberg       | Rural, agricultural area with a small town, partially forested                                 | $0.17 \pm 0.10$ | $0.83 \pm 0.43$ | $0.22 \pm 0.11$ | $0.28 \pm 0.17$ | $0.65 \pm 0.42$ | $2.2 \pm 0.69$ |
| Plänterwald        | <del>ea-</del> approx. 1 km <sup>2</sup> urban park abutting the Spree river in eastern Berlin | $0.20 \pm 0.06$ | $0.47 \pm 0.14$ | $0.33 \pm 0.12$ | $0.25 \pm 0.04$ | $3.7 \pm 0.90$  | $4.9 \pm 1.0$  |
| Tiergarten Tunnel* | 2.4 km tunnel, major 4-lane city thoroughfare in central Berlin                                | $2.0 \pm 2.2$   | $4.4 \pm 1.1$   | $2.6 \pm 1.3$   | $1.3 \pm 0.70$  | $0.39 \pm 0.24$ | $11 \pm 2.5$   |
| AVUS*              | Highly trafficked motorway in western Berlin (traffic jam)                                     | $6.3 \pm 3.2$   | $19 \pm 7.4$    | $6.6 \pm 1.6$   | $2.8 \pm 2.3$   | $0.00 \pm 0.00$ | $34 \pm 15$    |

\* automated sampling while driving; all other samples taken from a stationary location.

† 20 minute sampling duration. All other samples had 10 minute sampling duration.

**Table 3.** Basic bulk composition results, ratios, and air mass origin from HYSPLIT. Units are  $\mu\text{g m}^{-3}$  unless otherwise noted. For OC and ED measurement uncertainty is included.

|         | Total<br>PM10 | Air mass origin<br>(HYSPLIT)        | Total OC<br>( $\pm$ unc) | Total EC<br>( $\pm$ unc) | Total Ions* | OC:EC ratio | WSOC of OC<br>(%) | Ions:OC<br>ratio** |
|---------|---------------|-------------------------------------|--------------------------|--------------------------|-------------|-------------|-------------------|--------------------|
| Group A | 27.1          | Germany                             | $6.7 \pm 0.34$           | $1.7 \pm 0.084$          | 5.1         | 4.0         | 31%               | 0.56               |
| Group B | 20.0          | central Germany,<br>northern France | $3.0 \pm 0.15$           | $1.1 \pm 0.057$          | 5.3         | 2.7         | 34%               | 1.2                |
| Group C | 24.4          | North Sea                           | $3.5 \pm 0.17$           | $1.9 \pm 0.094$          | 5.7         | 1.8         | 27%               | 0.98               |
| Group D | 35.1          | Baltic                              | $7.2 \pm 0.36$           | $1.4 \pm 0.069$          | 5.0         | 6.4         | 30%               | 0.50               |
| Group E | 19.6          | North Sea,<br>Scandinavia, UK       | $5.5 \pm 0.27$           | $0.71 \pm 0.035$         | 3.2         | 8.1         | 19%               | 0.39               |
| B17     | 38.8          | Poland & east                       | $7.0 \pm 0.35$           | $2.3 \pm 0.12$           | 11          | 3.0         | 66%               | 1.3                |
| B19     | 31.0          | Poland & north                      | $5.9 \pm 0.30$           | $1.2 \pm 0.058$          | 6.0         | 5.1         | 37%               | 0.77               |
| B30     | 39.5          | Germany<br>(northern France)        | $3.9 \pm 0.20$           | $1.6 \pm 0.078$          | 15          | 2.5         | 56%               | 2.4                |

\*Ions includes 7 species and is not limited to sulfate, nitrate, and ammonium.

\*\*Ratio of ions (sulfate, nitrate, ammonium) to OC

**Table 4.** Chemical mass balance source apportionment results. Units are  $\mu\text{g m}^{-3}$  unless otherwise noted. Uncertainty is measurement uncertainty, in the case of SOA propagated uncertainty.

|         | Total OC<br>(unc) | % OC mass<br>apportioned | measured<br>WSOC (unc) | SOA*<br>(unc) | veg. det.<br>(std error) | wood burn.<br>(std error) | diesel<br>emissions<br>(std error) | gasoline<br>vehicles (std<br>error) | R <sup>2</sup> | $\chi^2$ |
|---------|-------------------|--------------------------|------------------------|---------------|--------------------------|---------------------------|------------------------------------|-------------------------------------|----------------|----------|
| Group A | 6.71±0.34         | 30.8                     | 2.06±0.10              | 1.91±0.11     | 1.07±0.13                | 0.21±0.04                 | 0.61±0.06                          | 0.19±0.02                           | 0.77           | 12.39    |
| Group B | 2.99±0.15         | 41.2                     | 1.00±0.05              | 0.91±0.05     | 0.57±0.07                | 0.12±0.03                 | 0.42±0.04                          | 0.12±0.02                           | 0.8            | 7.7      |
| Group C | 3.48±0.17         | 42.4                     | 0.94±0.05              | 0.87±0.05     | 0.52±0.06                | 0.10±0.02                 | 0.74±0.07                          | 0.11±0.02                           | 0.85           | 5.38     |
| Group D | 7.21±0.36         | 32.3                     | 2.11±0.11              | 1.99±0.11     | 1.44±0.17                | 0.17±0.04                 | 0.50±0.05                          | 0.22±0.03                           | 0.87           | 6.82     |
| Group E | 5.48±0.27         | 21.2                     | 1.05±0.05              | 0.97±0.06     | 0.59±0.07                | 0.12±0.03                 | 0.24±0.03                          | 0.21±0.02                           | 0.77           | 9.78     |
| B17     | 6.99±0.35         | 31.1                     | 4.61±0.23              | 4.40±0.24     | 0.91±0.10                | 0.30±0.07                 | 0.81±0.08                          | 0.15±0.03                           | 0.8            | 7.89     |
| B19     | 5.91±0.30         | 31.7                     | 2.19±0.11              | 2.03±0.12     | 1.05±0.12                | 0.22±0.05                 | 0.42±0.04                          | 0.18±0.03                           | 0.73           | 9.83     |
| B30     | 3.91±0.20         | 48.6                     | 2.21±0.11              | 1.90±0.13     | 0.63±0.08                | 0.44±0.09                 | 0.57±0.06                          | 0.28±0.04                           | 0.76           | 10.17    |

\*The SOA contribution was not part of the CMB results, but rather calculated as: unapportioned WSOC (SOA) = measured WSOC – 0.71\*apportioned wood burning.
